Version dated: May 29, 2019

# Characterizing and comparing phylogenetic trait data from their normalized Laplacian spectrum

ERIC LEWITUS<sup>1,2</sup>, LEANDRO ARISTIDE<sup>1</sup>, HELENE MORLON<sup>1</sup>

<sup>1</sup>*Institut de Biologie (IBENS), École Normale Supérieure, Paris, France*

<sup>2</sup>*Current address: Henry M. Jackson Foundation in support of the US Military HIV Research Program, Walter Reed Army Institute of Research, Silver Spring, MD 20910, USA*

**Corresponding author:** [elewitus@hivresearch.org](mailto:elewitus@hivresearch.org)

*Abstract.*— The dissection of the mode and tempo of phenotypic evolution is integral to our understanding of global biodiversity. Our ability to infer patterns of phenotypes across phylogenetic clades is essential to how we infer the macroevolutionary processes governing those patterns. Many methods are already available for fitting models of phenotypic evolution to data. However, there is currently no non-parametric comprehensive framework for characterising and comparing patterns of phenotypic evolution. Here we build on a recently introduced approach for using the phylogenetic spectral density profile to compare and characterize patterns of phylogenetic diversification, in order to provide a framework for non-parametric analysis of phylogenetic trait data. We show how to construct the spectral density profile of trait data on a phylogenetic tree from the normalized graph Laplacian. We demonstrate on simulated data the utility of the spectral density profile to successfully cluster phylogenetic trait data into meaningful groups and to characterise the phenotypic patterning within those groups. We furthermore demonstrate how the spectral density profile is a powerful tool for visualising phenotypic space across traits and for assessing whether distinct trait evolution models are distinguishable on a given empirical phylogeny. We illustrate the approach in two empirical datasets: a comprehensive dataset of traits involved in song, plumage and resource-use in tanagers, and a high-dimensional dataset of endocranial landmarks in New World monkeys. Considering the proliferation of morphometric and molecular data collected across the tree of life, we expect this approach will benefit big data analyses requiring a comprehensive and intuitive framework.

Keywords: phylogenetics; macroevolution; traits; primates; tanagers; Laplacian

1           Phylogenetic trait data are essential to understanding the evolution of biodiversity.  
2 They have been used to identify adaptive radiations (Harmon et al. 2010), infer stabilizing  
3 selection (Hansen 1997; Butler and King 2004), measure the phenotypic effects of species  
4 interactions (Drury et al. 2018) and environmental fluctuations (Clavel and Morlon 2017),  
5 and generally to estimate the role of the phylogeny in how traits evolve over time  
6 (Felsenstein, 1973). They are critical to connecting microevolutionary processes of natural  
7 selection to macroevolutionary patterns of phenotypic evolution (Hansen and Martins  
8 1996).

9           A wide range of approaches, reflecting the general interest of trait evolution among  
10 evolutionary biologists, have been developed to infer the mode and tempo of phenotypic  
11 evolution across clades. These include summary statistics that test for the degree of  
12 phylogenetic signal in trait data, such as Blomberg's  $K$  (Blomberg et al. 2003), and  
13 maximum likelihood-based techniques that fit models to phylogenetic trait data and  
14 estimate the rate at which traits evolve (see Pennell and Harmon (2013); Manceau et al.  
15 (2016); Lewitus (2018) for a review of currently available models). These models rely on  
16 the *a priori* formulation of a phenotypic model, which currently can be reduced to whether  
17 traits evolve according to a Brownian process along the phylogeny (Felsenstein 1985),  
18 towards a trait optimum (Hansen 1997), as an effect of increasing species diversity (Weir  
19 and Mursleen 2013) or environmental fluctuations (Clavel and Morlon 2017), or as a result  
20 of interspecific interactions (Drury et al. 2016; Manceau et al. 2016). Insofar as they  
21 represent a fixed set of biological scenarios, the reliance on parameterized models ultimately  
22 limits our ability to characterize the patterns of trait evolution along a phylogeny and  
23 compare those patterns between traits independently of pre-defined evolutionary processes.

24           In this paper, we introduce an approach for analysing phylogenetic trait data that  
25 requires no assumptions about the underlying generative model. This approach allows for  
26 comparisons of the evolutionary histories of traits evolving within a phylogenetic clade and

27 the characterization of trait evolution according to an intuitive graph-theoretical system.  
28 Our approach is based on the spectrum of the normalized graph Laplacian, which provides  
29 a framework for systematically characterizing and comparing the distribution of trait data  
30 across a phylogenetic tree. The normalized graph Laplacian has been successfully utilised  
31 in the physical sciences to understand how signal processes are embedded within a graph  
32 (Shuman et al. 2013) and has been applied to understanding high-dimensional data  
33 produced from, for example, social networks (Rohe et al. 2011), text classification (Apté  
34 et al. 1994), and image recognition (Zhang and Hancock 2008). It has also begun to be  
35 applied to the biological sciences to aid in big data analysis of metabolic networks (Deyasi  
36 et al. 2015) and cancer genomics (Rai et al. 2017). More recently, we introduced an  
37 approach for comparing and characterising phylogenies (Lewitus and Morlon 2016a) using  
38 the spectral density profile of the graph Laplacian of the distance matrix of a phylogeny,  
39 the so-called modified graph Laplacian (MGL), which is able to infer diversification  
40 patterns within a phylogeny, as well as directly compare patterns between phylogenies,  
41 absent any *a priori* model specification (Lewitus and Morlon 2016b). Together, these  
42 applications show the strength of applying the graph Laplacian. However, despite its  
43 widespread utility, no such framework has been developed for characterizing and comparing  
44 phylogenetic trait data.

45 We first describe how to construct the spectral density profile of the normalized  
46 graph Laplacian for phylogenetic trait data and demonstrate how to interpret it in terms of  
47 specific properties of phenotypic evolution. We use simulations to show how the profiles  
48 relate to conventional metrics of phylogenetic signal and models of trait evolution. We  
49 show how to compute the distance between profiles and cluster phylogenetic trait data  
50 based on those distances. Finally, we illustrate the utility of this approach for assessing  
51 whether distinct trait evolution models are distinguishable using the Cetacean phylogeny.  
52 We also illustrate the application of the approach on functional trait data for tanagers

53 (*Thraupidae*) and geometric morphometric data for the endocrania of New World monkeys  
54 (*Platyrrhini*). We think that such a non-parametric and comprehensive framework for  
55 studying phylogenetic trait diversification will be a valuable complement to existing  
56 model-based approaches.

57

## MATERIALS AND METHODS

58

### *Implementation*

59 Below, we describe how to use the normalized modified graph Laplacian (nMGL) to  
60 construct a spectral density profile for traits (i.e., unidimensional continuous extant tip  
61 data) on a phylogeny, how to characterize the profile in terms of evolutionary patterning,  
62 and how to compute the distance between profiles. We implemented these functionalities in  
63 the R package *RPANDA* freely available on CRAN (Morlon et al. 2016). In the analyses  
64 detailed below, phylogenies were simulated using the R package *TESS* (Höhna 2013); trait  
65 data for BM, OU and ACDC models were simulated using *mvMORPH* (mvSIM function  
66 Clavel et al. (2015)) and for DD and MC models with *RPANDA* (*sim.t.comp* function).  
67 Blombergs K was computed using *phytools* (Revell 2012); and MDI was computed using  
68 *geiger* (Harmon et al. 2008).

### *Construction of the Spectral Density Profile for Phylogenetic Trait Data*

70 We aim to provide a non-parameteric framework for characterizing and comparing patterns  
71 of phylogenetic traits (i.e., tip data) for a given phylogeny. We consider a fully bifurcated  
72 tree composed of  $m$  terminal branches (Fig. 1A). We note  $\vec{g}$  a vector of unidimensional  
73 continuous extant trait data associated to this tree. We consider this data as a particular  
74 kind of graph,  $G = (N, E, w)$ , composed of nodes representing extant species, edges  
75 delineating the relationships between nodes, and a weight associated to each edge,  
76 computed as  $w(i, j) = d_{i,j}|g_i - g_j|$  where  $d_{i,j}$  is the phylogenetic distance between tips  $i$  and  
77  $j$  and  $g_i$  is the trait value at tip  $i$ . Hence, the weight is a combination of phylogenetic and  
78 trait distances between two extant species. In Lewitus and Morlon (2016a), the nodes in

79 the graph represent both extant species and internal splitting events in the phylogeny; here  
80 we limit the nodes to extant species, as internal splitting events do not have associated  
81 trait data. We consider  $\Theta$  the matrix of weights (Fig. 1B) and  $D$  the degree matrix (the  
82 diagonal matrix where diagonal element  $i$  is computed as  $\delta_i = \sum_{k \neq i} w(i, k)$ ). We construct  
83 the normalized modified graph Laplacian (nMGL, see Table 1), defined as  
84  $D^{-1/2}(D - \Theta)D^{-1/2}$ , which is distinguished from the non-normalized graph Laplacian  
85  $(D - \Theta)$  because it is normalized by  $D$ . While the normalized version of the graph  
86 Laplacian loses some information on the size of the graph compared to the non-normalized  
87 version, it is more sensitive to fine-scale features of the graph (Banerjee and Jost 2008).  
88 Our approach aims to characterize and compare traits on the same phylogenetic tree  
89 (rather than traits between different phylogenetic trees) and so the size of the graph (i.e.,  
90 of the tree) is not important. The nMGL is a  $m \times m$  positive semi-definite matrix. It  
91 therefore has  $n$  non-negative eigenvalues,  ${}_n\lambda_1 \geq {}_n\lambda_2 \geq \dots \geq {}_n\lambda_m \geq 0$  (throughout, the  $n$   
92 subscript preceding symbols highlights that we are considering the normalized graph  
93 Laplacian). We convolve them with a Gaussian kernel to ensure a continuous distribution  
94 (Banerjee and Jost 2008). The spectral density profile (SDP) of  ${}_n\lambda$  from the nMGL,  
95 defined as  $f(x) = \sum_{i=1} (2\pi\sigma^2)^{-1/2} e^{\frac{-x - {}_n\lambda_i}{2\sigma^2}}$ , is plotted as a function of  ${}_n\lambda$  as  
96  $f^*(x) = \frac{f(x)}{\int f(y)dy}$  (Fig. 1C). Considering the success of previous work showing the capacity  
97 of spectral density profiling for differentiating graphs generated by different processes  
98 (Banerjee and Jost 2009; Arenas et al. 2006; McGraw and Menzinger 2008; Lewitus and  
99 Morlon 2016b), and particularly the framework we recently introduced for characterizing  
100 and comparing phylogenies based on their spectral density profiles (Lewitus and Morlon  
101 2016a), we hypothesized that the spectral density profile of the nMGL would be a powerful  
102 tool for characterizing and comparing trait evolution within phylogenetic clades.

104 The spectrum of  ${}_n\lambda$  computed from the nMGL represents primarily global properties of the  
105 structure of trait evolution within a phylogenetic clade. Each  ${}_n\lambda$  reflects the connectivity  
106 (in terms of edge-length) and difference in trait value between one tip and all other tips in  
107 a phylogeny. We know from the substantial body of existing work on the normalized graph  
108 Laplacian that large  ${}_n\lambda$  are characteristic of sparse neighbourhoods typical of highly  
109 divergent terminal branches (both in terms of trait value and phylogenetic distance) and  
110 small  ${}_n\lambda$  are characteristic of denser neighbourhoods typical of barely divergent terminal  
111 branches (Chung 1996; Chen et al. 2004). Additionally, for the normalized graph  
112 Laplacian,  $0 \leq {}_n\lambda \leq 2$  (Bauer and Jost 2009), which in the case of dense matrices (i.e., no  
113 zero entries, like  $\Theta$ ) becomes  $\sim 1 \leq {}_n\lambda \leq 2$  (Banerjee and Jost 2009). Therefore, as trait  
114 differences between closely related tips become smaller,  ${}_n\lambda \simeq 1$  accumulate and, as trait  
115 differences between closely related tips become larger,  ${}_n\lambda > 1$  accumulate. Importantly,  
116 trait differences here are relative, so small (or large) trait differences are only small (or  
117 large) in regard to the distribution of trait differences across the tree. Also, because the  
118 weights used to compute the nMGL are products of phylogenetic and trait distances, it is  
119 impossible to separate the relative contribution of each of these distances on the SDP. This  
120 is one of the reasons why the nMGL is useful for comparing various trait distributions on a  
121 given fixed tree (with fixed phylogenetic distance) and not across different trees.

122 We define three summary statistics computed from the spectrum of  ${}_n\lambda$  – the tracer,  
123 the fragmenter, and the splitter – that together define the phylogenetic trait space. Traits  
124 evolved under different evolutionary scenarios on the same tree occupy different regions of  
125 this space (Fig. 2).

126 **The tracer** is the peak height of the SDP, denoted  ${}_n\eta$ , and computed as the  
127 ln-transformed maximum value of  $f^*(x)$ ; it represents the iteration of  ${}_n\lambda$  around a single  
128 value. Higher tracer values mean smaller differences between closely related tips (low  
129 within-clade variance) and larger differences between distantly related tips (high

130 among-clade variance). Therefore, we expect the tracer to be a good measure of  
131 phylogenetic signal. In order to test this, we compared the tracer to conventional estimates  
132 of phylogenetic signal on trait data simulated on a phylogenetic tree. We simulated a single  
133 birth-death tree with 100 tips at 20 million years under constant speciation (0.2) and  
134 extinction (0.05) rates (throughout, rates of speciation and extinction are expressed in  
135 event per lineage per million year) and simulated 500 trait datasets on that tree under a  
136 Brownian motion (BM) model of trait evolution with variance  $\sigma^2 = 0.01$  (Cavalli-Sforza  
137 and Edwards 1967), an exponentially accelerating (AC) model with rate value  $\beta = 1.5$  and  
138  $\sigma^2 = 0.01$ , an exponentially decelerating (DC) model with rate value  $\beta = -0.1$  and  
139  $\sigma^2 = 0.01$  (Blomberg et al. 2003; Harmon et al. 2010), and a white-noise model by  
140 randomly drawing trait values from a normal distribution (with a mean of zero and  
141 standard deviation of one). For each of the three first models, we set the root value at 0.  
142 For each dataset, we estimated Blomberg's  $K$ , which measures the partitioning of variance  
143 using a BM model as reference, where  $K > 1$  means close relatives resemble one another  
144 more than expected under BM, and  $K < 1$  means they resemble one another less  
145 (Blomberg et al. 2003), and the morphology disparity index (MDI), which is a measure of  
146 the difference between the observed diversity through time curve and that expected under  
147 a BM model, where a higher MDI indicates that higher subclade disparity than expected  
148 under a BM model (Foote 1997; Harmon et al. 2003; Slater et al. 2010). We fit OLS  
149 regression models between  ${}_n\eta$  and both Blomberg's  $K$  and MDI for the 500 trait datasets.

150 **The fragmenter** is the skewness of the SDP, denoted  ${}_n\psi$ , and computed as the  
151 ln-transformed  $\frac{\mu_3}{\mu_2^{3/2}}$ , where  $\mu_i$  is the ordinary  $i$ th moment of the distribution; it represents  
152 the relative abundance of small and large  ${}_n\lambda$ . Therefore, as trait space becomes more  
153 clustered, irrespective of phylogenetic signal, the proportion of small  ${}_n\lambda$  increases and so  
154 does the fragmenter. Therefore, we expect the fragmenter to be a good measure of the  
155 discreteness of trait space. In order to test whether the fragmenter captures discrete



156 clusters of extant trait data, we simulated a single birth-death tree with 200 tips at 20  
157 million years under constant speciation (0.2) and extinction (0.05) rates and simulated 200  
158 datasets of discrete trait space under low and high phylogenetic signal. For low  
159 phylogenetic signal, we simulated trait data on four macroevolutionary landscapes  
160 (Boucher et al. 2017), each defined by a different polynomial function:  $V(x) = x^2$ ,  
161  $V(x) = x^4 - 0.5x^2$ ,  $V(x) = x^6 - 0.5x^2$ , and  $V(x) = x^8 - 0.5x^2$ , where the landscape is  
162 estimated as  $e^{-V(x)}$ . Here, an increase in the exponent of the first term generates a more  
163 discretized trait distribution (i.e., a deeper well in the macroevolutionary landscape). We  
164 set  $\sigma^2 = 0.5$ , the root value equal to 5, and the trait boundaries at  $[0, 10]$ . We plotted the  
165 landscapes as defined by the polynomial functions, histograms of the trait data for each  
166 landscape as realized in the simulations, and the spectral density profiles of each dataset.  
167 For high phylogenetic signal, we simulated trait data on the same birth-death tree under a  
168 DC model with rate value  $\beta = -0.6, -0.3, 0$  and  $\sigma^2 = 0.1$ , where more negative values of  $\beta$   
169 indicate more decelerated rates (Blomberg et al. 2003; Harmon et al. 2010). This generated  
170 trait data distributed in discrete monophyletic clusters across the tree. For the low and  
171 high phylogenetic signal datasets, we computed the fragmenter and compared values as a  
172 function of macroevolutionary landscape and of  $\beta$ .

173 **The splitter** is the principal  $n\lambda$ , denoted  $(n\lambda^*)$ ; it is diagnostic of the disjointedness  
174 of a graph, where larger splitter values imply a more bipartite structure (Banerjee and Jost  
175 2008; Bauer and Jost 2009). In macroevolutionary terms, as traits become increasingly  
176 bimodally distributed with a strong phylogenetic signal, the splitter increases. As  $n\lambda \leq 2$   
177 for the nMGL, the splitter  $\simeq 2$  when a clade is composed of two phylogenetically distinct  
178 subclades with different mean trait values. To assess the relationship between the spectral  
179 density profile and differences in mean trait values on a phylogeny, we simulated a single  
180 birth-death tree with constant speciation (0.2) and extinction (0.05) rates with 200 tips at  
181 20 million years. We then simulated BM models ( $\sigma = 0.01$ ) with  $q$  differences in mean trait

182 values for  $q = 0 - 4$  by defining different mean trait values for  $q + 1$  monophyletic sets of  
183 tips, where the mean trait value for  $q_0$  was randomly drawn from a normal distribution  
184 with a mean value between  $0 - 1$  (and standard deviation of one) and subsequent mean  
185 trait values were defined as two-times the previous mean. We then compared  $n\lambda^*$  for each  
186 set. The value of the splitter is expected to correlate with the disjointedness of the graph,  
187 where higher values indicate the nMGL is more bipartite and so can be segregated into two  
188 monophyletic groups with distinct mean trait values (Bauer and Jost 2009). To test  
189 whether there were, in fact, two monophyletic clusters, we used k-means clustering (for  
190  $k=2$ ) on the nMGL of the phylogenetic trait data. We then calculated the average  
191 branch-length distance between tips in cluster 1 and tips in cluster 2. For phylogenetic  
192 trait data that can be separated into two monophyletic clusters, the average between-group  
193 distance will equal two times the crown age of the tree. We present this as a heuristic test  
194 of the monophyly of trait values when the splitter  $\simeq 2$ . To test the effect of phylogenetic  
195 signal on the splitter value, we simulated 10 trait datasets with one difference in mean trait  
196 values on a 100-tip constant-rate birth-death tree as above. We then randomized the  
197 distribution of tip data within each cluster 100 times and compared the resulting splitter  
198 value for the randomized trees against the original splitter value. We compared the splitter  
199 values for the two-cluster BM datasets and the randomized two-cluster datasets to 100  
200 datasets simulated under a simple BM process (with no clusters and  $\sigma = 0.01$ ).

201 To test the effect of erroneous data on the nMGL, we simulated trait data under a  
202 BM process on a 100-tip constant-rate birth-death tree ( $\sigma = 0.01$ ). We tested both the  
203 effect of increasing the amount of error and increasing the number of tips with error. For  
204 the former, we introduced error on 10% of randomly drawn tips as a sampling variance  
205 equal to  $n$  times the standard error for  $n = 1, 2, 3$ . For the latter, we introduced error on  
206 20, 30, 40, 100% of tips as a sampling variance equal to the standard error. We simulated  
207 100 datasets for each scenario. We compared the resulting splitter, tracer, and fragmenter

208 values to BM datasets ( $\sigma = 0.01$ ) and ACDC datasets ( $\beta = -1.1, \sigma = 0.01$ ) simulated on  
209 the same tree and with no introduced error.

## 210 *Clustering nMGLs from Their Spectral Density Profiles*

211 To demonstrate whether we can distinguish phylogenetic trait data simulated under trait  
212 models we know are distinguishable, we clustered nMGLs constructed for trait data on the  
213 same phylogeny under different trait models. To cluster nMGLs, we computed the  
214 Jensen-Shannon distance between spectral density profiles. The Jensen-Shannon distance is  
215 defined as

$$\Delta(\Lambda_1, \Lambda_2) = \sqrt{\frac{1}{2}KL(f_1^*, f^*) + \frac{1}{2}KL(f_2^*, f^*)} \quad (1)$$

216 where  $f_1^*$  and  $f_2^*$  are spectral densities for profiles 1 and 2,  $f^* = \frac{1}{2}(f_1^* + f_2^*)$ , and KL is the  
217 Kullback-Leibler divergence measure for the probability distribution (Endres and Schindelin  
218 2003). We then cluster the matrix of Jensen-Shannon distances for each profile pair using  
219 hierarchical clustering with bootstrap resampling and k-medoids clustering using optimal  
220 silhouette width,  $s(i)$ , which is a measure of the between/within-variance of each datapoint  
221  $i$  assigned to a cluster; data are typically considered structured at  $\bar{s} > 0.51$  (Szekely and  
222 Rizzo 2005; Reynolds et al. 2006). In each case, the number of clusters is not set *a priori*.

223 We tested the efficacy of clustering on profiles using trait datasets simulated on  
224 birth-death trees. We simulated a total of 1500 trait datasets under a BM model of trait  
225 evolution with variance  $\sigma^2 = 0.01$  (Cavalli-Sforza and Edwards 1967), an exponentially AC  
226 model with rate value  $\beta = 1.5$  and  $\sigma^2 = 0.01$ , and an exponentially DC model with rate  
227 value  $\beta = -0.1$  and  $\sigma^2 = 0.01$  (Blomberg et al. 2003; Harmon et al. 2010). For each model,  
228 we set the root value at 0. We visualised this clustering by plotting the profiles in a  
229 multidimensional space defined by  ${}_n\lambda^*$ ,  ${}_n\psi$ , and  ${}_n\eta$ .

230 We tested the ability of the spectral density profile to find meaningful clusters of  
231 trait models on different tree shapes and sizes. To test for the effect of tree shape, we

232 simulated trait datasets on 200-tip birth-death trees (with a max age of 20Ma) with  
233 constant speciation (0.2) and extinction (0.02) rates, with decreasing speciation  
234 ( $0.1 * e^{-0.2t}$ ) and constant extinction (0.02) rates, and with increasing speciation ( $0.1 * e^{0.1t}$ )  
235 and constant extinction (0.05) rates. We conducted analyses on identical trees without  
236 pruning extinct lineages, resulting therefore in non-ultrametric trees, to test whether the  
237 profiles of different models were more distinguishable on a non-ultrametric tree compared  
238 to an ultrametric tree, as is expected from likelihood-based approaches (Cooper et al.  
239 2015). To test for the effect of tree size, we simulated 6000 trait datasets under the same  
240 BM, AC, and DC trait model parameters on birth-death trees with constant speciation  
241 (0.2) and extinction (0.05) rates with 20, 50, 100, 200, and 500 tips (with a max age of  
242 20Ma). As above, phylogenies were simulated using the *R* package *TESS* (Höhna 2013)  
243 and trait data were simulated using *mvMORPH* (Clavel et al. 2015).

244

## *Applications*

245 To illustrate our approach, we demonstrate three applications. First, we used the Cetacean  
246 phylogeny (87 spp.) (Steeiman et al. 2009) to illustrate how our approach can be used to  
247 assess the distinguishability of different trait evolution models in a particular clade. We  
248 simulated six trait models under a range of parameter values on the Cetacean phylogeny:  
249 BM with  $\sigma^2 = 0.1 - 5$ ; Ornstein-Uhlenbeck (OU) with strength of pull towards an optimum  
250  $\alpha = 1 - 20$  and  $\sigma^2 = 0.1$ ; exponential diversity-dependence (DD) with slope parameter  
251  $r = -1.1 - -0.1$  and  $\sigma^2 = 0.1$ ; AC with rate value  $\beta = 1.1 - 1.5$  and  $\sigma^2 = 0.1$ ; DC with  
252 rate value  $\beta = -0.5 - -0.1$  and  $\sigma^2 = 0.1$ ; and matching competition (MC) with the  
253 strength of competition  $S = -1.1 - -0.1$  and  $\sigma^2 = 0.1$ . For each model, we simulated 500  
254 datasets with the root value set to zero. For all datasets, we computed the spectral density  
255 profile and clustered them using hierarchical and k-medoid clustering. Second, we used a  
256 tanager phylogeny (350 spp.) (*Thraupidae*) with 27 phylogenetically corrected principal

257 component traits (pPC traits) spanning traits related to song, plumage, and resource-use  
258 taken from Drury et al. (2018). Ideally, we would have used non-phylogenetically corrected  
259 PCs but these were not available. We computed the spectral density profiles for the pPC  
260 traits and clustered them using hierarchical and k-medoid clustering and computed their  
261 spectral density profile summary statistics. Finally, we used a geometric morphometrics  
262 dataset consisting of 399 three-dimensional Procrustes superimposed landmark coordinates  
263 describing the external brain shape of 48 species of New World monkeys (*Platyrrhini*)  
264 (Aristide et al. 2016). For each landmark, we computed the Euclidean distance between  
265 the landmark and the clade mean for that landmark, in order to reduce the dimensionality  
266 of the data. We refer to these distances simply as landmarks. We computed the spectral  
267 density profile for each of the 399 landmarks and clustered them using hierarchical and  
268 k-medoid clustering and plotted their spectral density profile summary statistics in  
269 multidimensional space. In order to test how much information was lost in this  
270 dimensionality reduction (Monteiro et al. 2000; Uyeda et al. 2015), we also clustered the  
271 profiles computed separately for the coordinates along each axis. Even though these axes  
272 may not necessarily be aligned with the most biologically meaningful directions of  
273 variation, it is a straightforward and convenient way of analyzing the data.

274

## RESULTS

### 275 *Interpreting the Spectral Density Profile for Phylogenetic Trait Data*

276 The shape of the spectral density profile of the nMGL reveals many aspects characteristic  
277 of the underlying evolution of a trait within a phylogenetic clade. Specifically, the tracer  
278 (peak height,  ${}_n\eta$ ), the fragmenter (skewness,  ${}_n\psi$ ) and the splitter (principal  ${}_n\lambda$ ,  ${}_n\lambda^*$ ), of the  
279 profile may be interpreted in terms of the evolutionary history of the trait (Fig. 2).

280 The tracer summary statistic represents the peak height of the spectral density  
281 profile. In macroevolutionary terms, this is indicative of the phylogenetic signal of a trait,  
282 where larger  ${}_n\eta$  indicate more phylogenetic signal (Fig. 3A-C). We show that the tracer is  
283 strongly correlated with conventional summary statistics of phylogenetic signal, with  ${}_n\eta$   
284 increasing with Blomberg's  $K$  ( $y = 3.44 - 4.13x + 1.36x^2$ ,  $R^2 = 0.96$ ,  $P < 0.01$ ) and  
285 decreasing with MDI ( $y = -2.65 + 2.23x - 0.34x^2$ ,  $R^2 = 0.93$ ,  $P < 0.01$ ) (Fig. 3D).  
286 White-noise models fall at the lowest end of tracer values, converging with AC models  
287 simulated with  $\beta = 1.5$  in terms of tracer values (Fig. 3).

288 The fragmenter summary statistic represents the relative abundance of small *versus*  
289 large  ${}_n\lambda$ . In macroevolutionary terms, larger  ${}_n\psi$  indicate a more discrete distribution of  
290 trait means in trait space. We show that for trait data simulated on increasingly  
291 discretized macroevolutionary landscapes, spectral density profiles have correspondingly  
292 higher fragmenter values (Fig. 4A-C). We also show for trait data simulated with DC  
293 models with an increasingly negative rate parameter,  $\beta$ , which produce increasingly  
294 discretized trait space, that spectral density profiles have correspondingly higher  
295 fragmenter values (Fig. 4D-F). Notably, the discrete clusters of mean trait values generated  
296 by macroevolutionary landscapes are generally not monophyletic, whereas those generated  
297 by DC models are monophyletic.

298 The splitter summary statistic, which is the principal  $n\lambda$  computed from the nMGL,  
299 is diagnostic of the bipartiteness of the nMGL. Specifically, it is indicative of how easily the  
300 graph can be disjointed into two components. We show that splitter values increase  
301 (approaches 2) as the number of monophyletic groups with different trait means  
302 approaches two (Fig. 5A-C). When groups are defined using k-means clustering (with  
303  $k = 2$ ) on the nMGL, the average phylogenetic distance between groups approaches two  
304 times the crown age of the phylogeny when there are two monophyletic groups,  
305 demonstrating that clustering on the nMGL allows recovering these two groups (Fig. 5D).  
306 Splitter values obtained from the randomized datasets are similar to those obtained from  
307 the original datasets, suggesting that phylogenetic signal has little effect on splitter values  
308 (Supplemental Fig. 1).

309 Importantly, the fragmenter and tracer values are sensitive to the introduction of  
310 erroneous data, although not dramatically (Supplemental Fig. 2). When a considerable  
311 amount of sampling variance (equal to three times the standard error) is introduced on  
312 10% of tips, fragmenter and tracer values decrease only slightly. The impact of erroneous  
313 data only becomes appreciable when it is introduced on a large proportion of tips ( $\geq 30\%$ ).  
314 However, it is only when 100% of tips are affected by erroneous data that the inference of  
315 fragmenter and tracer values begins to approach that of AC models ( $\beta = 1.5$ ), which shows  
316 that the nMGL is in large robust to error-prone data.

### 317 *Clustering Models of Phylogenetic Trait Data*

318 For the traits simulated on the constant-rate birth-death trees under the three different  
319 trait evolution models, we found that the spectral density profiles were optimally clustered  
320 into three groups (bootstrap probability  $> 0.95$ ) (Fig. 6A). Separate clusters could be  
321 overwhelmingly ( $> 95\%$ ) assigned to AC, BM, and DC models with an average silhouette  
322 width= 0.6. The DC cluster is considerably farther from the AC and BM clusters than the

323 AC and BM clusters are from each other, based on Euclidean distance. Trait models  
324 simulated on increasing-rate and decreasing-rate trees show slightly different abilities to  
325 cluster trait models using spectral density profiles. They also show different configurations  
326 of profiles in multidimensional space, although this is expected because the nMGL is  
327 computed using the phylogenetic distance matrix, which is sensitive to tree shape. For the  
328 increasing-rate tree, the profiles were optimally clustered into three groups (bootstrap  
329 probability  $> 0.95$ ), each of which could be exclusively assigned to either AC, BM, or DC  
330 models with an average silhouette width= 0.79 (Fig. 6B). Similarly to the constant-rate  
331 tree, the DC cluster is considerably farther from the AC and BM than the AC and BM are  
332 from each other. For the decreasing-rate tree, we found two significant clusters (bootstrap  
333 probability  $> 0.95$ ), one of which can be exclusively assigned to DC models and another  
334 that is a hodgepodge of AC and BM trait models with an average silhouette width= 0.55  
335 (Fig. 6C). When plotted in multidimensional space, the AC and BM models simulated on  
336 the decreasing-rate tree occupy the same region and are therefore indistinguishable based  
337 on their spectral density profile summary statistics for this tree.

338 For the constant-rate non-ultrametric tree, trait models are also distinguishable  
339 based on hierarchical and k-medoids clustering (Supplemental Fig. 3A). The average  
340 silhouette width for clusters of traits on the non-ultrametric tree is 0.82, compared to only  
341 0.6 on the ultrametric tree (Supplemental Fig. 3B), which demonstrates that the trait  
342 models are more distinguishable on the non-ultrametric tree. We similarly found trait  
343 models to be distinguishable on increasing-rate (Supplemental Fig. 3C) and decreasing-rate  
344 (Supplemental Fig. 3D) non-ultrametric trees.

345 We estimated the effects of tree size on spectral density profile summary statistics.  
346 Fragmenter and tracer values increase with tree size, while splitter values decrease with  
347 tree size (Supplemental Fig. 4A). At 20 tips, the profiles of AC, BM, and DC models  
348 occupy the same phylogenetic trait space, but at 50 tips the models are distinguishable



349 (Supplemental Fig. 4B). While the nMGL loses some information on the size of the graph  
350 compared to the non-normalized version, clearly there is still some effect of size. This is  
351 likely because size and shape are integrated in phylogenies.

## 352 *Applications*

353 Traditionally, likelihood-based models are fit to phylogenetic trait data and the model  
354 showing the best support is inferred as the generative one. Oftentimes the difference in  
355 support between models is small and therefore finding traits with similar evolutionary  
356 histories or comparing those evolutionary histories can be difficult. The ability of our  
357 approach to directly compare the spectral density profiles of the nMGLs of different traits  
358 on the same tree allows us to find clusters of traits with similar evolutionary histories and  
359 then compare those histories in a multidimensional space defined by interpretable  
360 parameters without needing to qualify differences based on estimated likelihoods.

361 By simulating datasets under different trait models on the Cetacean phylogeny, we  
362 are able to visualize how distinguishable these models are from one another under different  
363 parameter values (Fig. 7). When all parameter values are taken together, we are not able  
364 to clearly distinguish between all models using hierarchical clustering (Fig. 7). While  
365 under certain parameter values each model occupies its own space, there is nonetheless  
366 overlap for parameter values, suggesting that, for the Cetacean phylogeny, trait evolution  
367 under different phenotypic models are quite similar. Particularly similar models are DC  
368 and DD, although these diverge in phylogenetic trait space for large parameter values; and  
369 OU and AC, but unsurprisingly, because these two models are algebraically identical on  
370 ultrametric trees (Uyeda et al. 2015).

371 We clustered the spectral density profiles for 27 pPC traits in the tanager  
372 phylogeny. We identified two clusters using hierarchical clustering (bootstrap  
373 probability= 0.96) (Fig. 8A); and found the same two clusters using k-medoid clustering,

374 where the inferred axes explained 69% of variance among the spectral density profiles (Fig.  
375 8B). Cluster 1 was comprised of 10 plumage traits, 6 resource-use traits, and 1 song trait,  
376 whereas Cluster 2 was comprised of 9 song traits and 1 resource-use trait, suggesting  
377 different evolutionary histories for different types of traits (Fig. 8B). Cluster 1 showed  
378 significantly higher ( $T > 2.8$ ,  $P < 0.01$ ) splitter, fragmenter, and tracer values compared to  
379 Cluster 2 (Fig. 8C). This suggests that that plumage and resource-use traits have a  
380 stronger phylogenetic signal and evolve into more discrete trait space, indicative of  
381 monophyletic clusters of traits. While the plumage and resource-use cluster have a  
382 significantly higher splitter value than the song cluster, both have low splitter values (i.e.,  
383  $\ll 2$ ) and therefore little evidence of bipartiteness.

384 The landmark data for New World monkeys clustered into three groups according to  
385 k-medoid clustering, with a minimum average silhouette width of 0.51, and according to  
386 hierarchical clustering (bootstrap probability  $> 0.9$ ) (Fig. 8D). Cluster 1 showed  
387 significantly higher ( $T > 1.96$ ,  $P \leq 0.05$ ) fragmenter and tracer values, suggesting a  
388 stronger phylogenetic signal and evolution into more discrete trait space compared to the  
389 other clusters of landmarks (Fig. 8E). Cluster 2 showed significantly lower fragmenter and  
390 tracer values than the other clusters, suggesting it evolves with little phylogenetic signal  
391 into a more uniform trait space. Cluster 3 showed intermediary fragmenter and tracer  
392 values, but significantly higher splitter values, indicative of more bipartiteness. The  
393 relationship between fragmenter and tracer, which is indicative of the amount of  
394 convergence in trait space, shows that tracer values increase as a function of fragmenter  
395 values faster based on a one-sided t-test ( $P < 0.05$ ) in cluster 1 compared to clusters 2 and  
396 3, suggesting lower levels of convergence in cluster 1. Interestingly, the three clusters  
397 broadly correspond to well-defined brain regions (Fig. 8F). Specifically, cluster 1 comprises  
398 landmarks mostly located on the parietal, cerebellar, and the anterior portion of the frontal  
399 region, cluster 2 landmarks mainly correspond to the temporal, occipital, and stem regions,

400 and cluster 3 comprises landmarks on the posterior and ventral areas of the frontal region  
401 and parts of the temporal. These results suggest that different brain regions evolved with  
402 different evolutionary histories. When we clustered the landmark data along each axis  
403 separately, treating the coordinates as tip data, we identified the same three clusters along  
404 each axis according to k-medoid clustering, with a minimum average silhouette width for  
405 each cluster of 0.46, and according to hierarchical clustering (bootstrap probability > 0.9).

## DISCUSSION

406

407 We recently introduced an approach for characterizing and comparing phylogenies using  
408 the spectrum of the graph Laplacian (Lewitus and Morlon 2016a). Here, we have extended  
409 this approach to analyse the evolution of traits within phylogenetic clades. We have shown  
410 how to compute the spectral density profile of the nMGL for phylogenies with associated  
411 trait data and demonstrated how to use these profiles to characterize and compare trait  
412 data within a phylogenetic clade. This provides a broad, scalable framework for  
413 characterizing the distribution of traits within a phylogenetic clade without classifying  
414 those distributions according to pre-defined models of phenotypic evolution. This  
415 non-parametric approach therefore provides a complement to existing model-based  
416 approaches to studying phenotypic evolution.

417 Because the spectral density profile of the nMGL is computed directly from the  
418 phylogeny and trait data, it provides a comprehensive rendering of the structure of trait  
419 evolution across a phylogenetic clade. Consequently, the spectral density profiles of  
420 different traits on a phylogenetic tree, unlike likelihood values or summaries of phylogenetic  
421 signal, can be clustered absent any *a priori* model specification. We show that this is  
422 successful in distinguishing between phylogenetic trait data generated under different  
423 macroevolutionary processes and sensitive to the parameter values under which those  
424 processes are generated. Hence, in the same way that spectral density profiles have been  
425 used for identifying principal patterns of diversification in vertebrates (Lewitus and Morlon  
426 2016b), they can be used for identifying principal patterns of phenotypic evolution across  
427 multiple traits within clades, as we have illustrated here with two empirical datasets.  
428 Spectral density profiles can also be used to quickly evaluate how distinguishable different  
429 trait evolutionary processes are, as we have illustrated here on the Cetacean phylogeny.  
430 This can be very useful when developing new models, to make sure they will be

431 distinguishable before putting all the effort into develop likelihood-based inferences for  
432 these models. Similarly, although it is impossible to separate the relative contribution of  
433 phylogenetic and trait distances on the SDP, it is possible to compare SDPs for the same  
434 trait data across multiple versions of a phylogeny (e.g., a posterior distribution of trees  
435 generated by Bayesian inference) and thus estimate the effect of tree construction on  
436 inferences of trait evolution. We can also anticipate that spectral density profiles will be  
437 useful to compute the distance between simulated and real data in Approximate Bayesian  
438 Computation approaches (Beaumont 2010) for fitting models of phenotypic evolution that  
439 are not amenable to likelihood computation (e.g., Clarke et al. (2017)). Although currently  
440 limited to the analysis of continuous traits, an extension of the nMGL to incorporate  
441 discrete binary traits would be straightforward: the trait distance between species would  
442 be 0 or 1 if pairs have the same or a different trait, respectively. Existing work on signed  
443 graph Laplacians (Kunegis et al. 2010), which attach a positive, negative, or neutral sign to  
444 each edge, already show the potential for using graph Laplacians to explore graphs with  
445 associated discrete values. As there are a wide range of discrete traits that are the focus of  
446 many macroevolutionary questions (e.g., Beaulieu et al. (2013)). we think development of  
447 the nMGL for the analysis of discrete trait evolution is an important direction for future  
448 work to move in.

449         When reduced to their constituent properties (i.e., splitter, fragmenter, and tracer  
450 values), spectral density profiles are useful in summarizing the structure of phylogenetic  
451 trait data and in visualizing differences between them. The tracer is a measure of  
452 phylogenetic signal and correlates well with conventional summary statistics. Blomberg's  
453  $K$ , as a measure of the partitioning of within- *versus* among-clade variance, resembles what  
454 the tracer is measuring, which is the iteration of  $n\lambda$  around a single value. When within-clade  
455 variance is low and among-clade variance is high, then the majority of  $n\lambda$  will have a  
456 similar value, the tracer will be high and so will Blomberg's  $K$ . The fragmenter measures

457 the discreteness of phenotypic space. Higher fragmenter values indicate that trait values  
458 are distributed in more discrete groups in phenotypic space, as would occur under an early  
459 burst model of trait diversification or high levels of convergence to multiple optima. The  
460 relationship between the tracer and fragmenter gives some indication as to whether  
461 convergence has likely occurred: the ratio of tracer to fragmenter will be higher if the  
462 discretization of trait values in phenotypic space shows a strong phylogenetic signal (i.e., in  
463 the absence of convergence). We show, for example, that a two-peak macroevolutionary  
464 landscape results in high fragmenter values, but relatively lower tracer values than occur  
465 under a DC model, indicative of the high level of phenotypic convergence in the  
466 macroevolutionary landscape model and low level of phenotypic convergence in the DC  
467 model. Of course, we cannot assign a threshold value for convergence, above which the  
468 tracer to fragmenter ratio conclusively evinces phenotypic convergence. However, for a  
469 given analysis of different trait data on a tree, we recommend comparing tracer to  
470 fragmenter ratios between analyses, in order to deduce the comparative levels of  
471 convergence between datasets. Finally, the splitter of the nMGL is diagnostic of the  
472 bipartiteness of the graph and therefore, in terms of phylogenetic trait data, higher splitter  
473 values indicate a bimodal distribution of trait values with high phylogenetic signal.

474 We analyse a previously published dataset on pPCs for tanagers (Drury et al. 2018)  
475 to show the usefulness of clustering phylogenetic trait data to identify and characterize  
476 traits with similar evolutionary histories among a set. Our result, that the evolution of  
477 song-related traits is distinct from that of plumage- and resource-use-related traits, is  
478 consistent with those found in Drury et al. (2018) for species that are year-round territorial  
479 and/or found in dense habitats. The high tracer and fragmenter values in plumage and  
480 resource-use traits suggests the discretized trait space of these traits possesses a high  
481 phylogenetic signal, while the low tracer and fragmenter values in song traits suggests low  
482 phylogenetic signal and non-discretized trait space.

483 We analyse a dataset of 399 landmarks on the endocrania of 48 species of New  
484 World monkeys. We show that these landmarks cluster into three groups. Landmarks  
485 within each cluster delineate meaningful regions of the external brain morphology, which  
486 suggests that each of these regions evolved differently. Cluster 1, which mostly represents  
487 the anterior frontal, parietal, and cerebellar regions, shows these regions have evolved into  
488 a discretized trait space with high phylogenetic signal, whereas cluster 2, which defines the  
489 temporal, occipital, and stem regions, shows these regions have evolved in a more uniform  
490 space with low phylogenetic signal. Cluster 3, which defines the posterior and ventral areas  
491 of the frontal region and part of the temporal region, also shows evidence of these regions  
492 evolving into a discretized trait space, but with higher levels of convergence than the  
493 regions of cluster 1. Despite the differences in approach, these results align well with a  
494 previous analysis of the same dataset conducted using PCA (Aristide et al. 2016), which  
495 suggests that, during the adaptive radiation of New World monkeys, brain shape evolved  
496 first into discrete regions of morphospace, with subsequent bursts of evolution generating  
497 convergence among clades. Moreover, according to Aristide et al. (2016), the different  
498 stages of this diversification can be associated to the evolution of particular regions of the  
499 brain. For example, coincident with our results for cluster 1, the anterior frontal region  
500 would have diversified early into discrete trait optima, while convergent changes would be  
501 mostly associated with other areas of the frontal region, in agreement with our cluster 3.  
502 Overall, our results support the idea that there has been differential selection on different  
503 brain regions in New World monkeys, due both to an early adaptive radiation and  
504 convergence on ecologically relevant traits (Rosenberger 1992; Gavrilets and Losos 2009;  
505 Aristide et al. 2015, 2016).

506 A major focus of work on phenotypic evolution relates to the study and  
507 identification of co-evolving traits using multivariate models (Clavel et al. 2015).  
508 Specifically, the correlated evolution of multiple traits resulting in evolutionary integration

509 expects such sets of traits to have shared evolutionary histories (Goswami 2007). We would  
510 therefore also expect that these traits, whether they are biologically integrated or  
511 co-evolving with some shared variable, will have similar spectral density profiles; and so  
512 clustering profiles may be a way to identify different sets of integrated traits from  
513 multivariate data. This can become particularly useful when there are many traits, as is  
514 more often becoming the case with the proliferation of trait data (e.g., Jones et al. (2009);  
515 Hamish et al. (2014)).

516 We have developed an approach, implemented in user-friendly software, which is a  
517 valuable addition to existing PCMs and provides a new way to analyse and conceive  
518 phenotypic evolution.

519 **Acknowledgments** We would like to thank Alex Bjarnason, Julien Clavel,  
520 Jonathan Drury, Carmelo Fruciano, Odile Maliet, Marc Manceau, Olivier Missa, and  
521 Guilhem Sommeria Klein for helpful comments on the manuscript. EL would like to thank  
522 Evan Charles for helpful discussion. Funding was provided by the CNRS and a grant  
523 (PANDA) from the European Research Council (ERC) attributed to HM. The views  
524 expressed are those of the authors and should not be construed to represent the positions  
525 of the U.S. Army, the Department of Defense, or the Department of Health and Human  
526 Services.



\*

527

528 References

- 529 Apté, C., F. Damerau, and S. M. Weiss. 1994. Automated learning of decision rules for text categorization.  
530 ACM Trans. Inf. Syst. 12:233–251.
- 531 Arenas, A., A. Diaz-Guilera, and C. J. Perez-Vicente. 2006. Synchronization reveals topological scales in  
532 complex networks. Phys. Rev. Lett. 96:114102.
- 533 Aristide, L., S. F. dos Reis, A. C. Machado, I. Lima, R. T. Lopes, and S. I. Perez. 2016. Brain shape  
534 convergence in the adaptive radiation of new world monkeys. Proceedings of the National Academy of  
535 Sciences 113:2158–2163.
- 536 Aristide, L., A. L. Rosenberger, M. F. Tejedor, and S. I. Perez. 2015. Modeling lineage and phenotypic  
537 diversification in the new world monkey (platyrrhini, primates) radiation. Molecular Phylogenetics and  
538 Evolution 82:375–385.
- 539 Banerjee, A. and J. Jost. 2008. On the spectrum of the normalized graph laplacian. Linear Algebra and its  
540 Applications 428:3015–3022.
- 541 Banerjee, A. and J. Jost. 2009. Graph spectra as a systematic tool in computational biology. Networks in  
542 Computational Biology 157:2425–2431.
- 543 Bauer, F. and J. Jost. 2009. Bipartite and neighborhood graphs and the spectrum of the normalized graph  
544 Laplacian. ArXiv e-prints .
- 545 Beaulieu, J. M., B. C. O'Meara, and M. J. Donoghue. 2013. Identifying Hidden Rate Changes in the  
546 Evolution of a Binary Morphological Character: The Evolution of Plant Habit in Campanulid  
547 Angiosperms. Systematic Biology 62:725–737.
- 548 Beaumont, M. A. 2010. Approximate Bayesian Computation in Evolution and Ecology. Annual Review of  
549 Ecology, Evolution, and Systematics 41:379–406.
- 550 Blomberg, S. P., T. Garland Jr, and A. R. Ives. 2003. Testing for phylogenetic signal in comparative data:  
551 behavioral traits are more labile. Evolution 57:717–745.

- 552 Boucher, F. C., V. Démary, E. Conti, L. J. Harmon, and J. Uyeda. 2017. A general model for estimating  
553 macroevolutionary landscapes. *Systematic biology* .
- 554 Butler, M. A. and A. A. King. 2004. Phylogenetic comparative analysis: a modeling approach for adaptive  
555 evolution. *The American Naturalist* 164:683–695.
- 556 Cavalli-Sforza, L. L. and A. W. Edwards. 1967. Phylogenetic analysis: models and estimation procedures.  
557 *Evolution* 21:550–570.
- 558 Chen, G., G. Davis, F. Hall, Z. Li, K. Patel, and M. Stewart. 2004. An interlacing result on normalized  
559 laplacians. *SIAM Journal on Discrete Mathematics* 18:353–361.
- 560 Chung, F. 1996. *Spectral Graph Theory* 92. American Mathematical Society, Fresno, CA.
- 561 Clarke, M., G. H. Thomas, and R. P. Freckleton. 2017. Trait evolution in adaptive radiations: modeling  
562 and measuring interspecific competition on phylogenies. *The American Naturalist* 189:121–137.
- 563 Clavel, J., G. Escarguel, and G. Merceron. 2015. mvmorph: an r package for fitting multivariate  
564 evolutionary models to morphometric data. *Methods in Ecology and Evolution* 6:1311–1319.
- 565 Clavel, J. and H. Morlon. 2017. Accelerated body size evolution during cold climatic periods in the  
566 Cenozoic. *Proceedings of the National Academy of Sciences of the United States of America*  
567 114:4183–4188.
- 568 Cooper, N., G. H. Thomas, C. Venditti, A. Meade, and R. P. Freckleton. 2015. A cautionary note on the  
569 use of ornstein uhlenbeck models in macroevolutionary studies. *Biological Journal of the Linnean*  
570 *Society* 118:64–77.
- 571 Deyasi, K., A. Banerjee, and B. Deb. 2015. Phylogeny of metabolic networks: A spectral graph theoretical  
572 approach. *Journal of Biosciences* 40:799–808.
- 573 Drury, J., J. Clavel, M. Manceau, and H. Morlon. 2016. Estimating the Effect of Competition on Trait  
574 Evolution Using Maximum Likelihood Inference. *Systematic Biology* 65:700–710.
- 575 Drury, J. P., J. A. Tobias, K. J. Burns, N. A. Mason, A. J. Shultz, and H. Morlon. 2018. Contrasting  
576 impacts of competition on ecological and social trait evolution in songbirds. *PLOS Biology* 16:1–23.

- 577 Endres, D. and J. Schindelin. 2003. A new metric for probability distributions. *IEEE Transactions on*  
578 *Information Theory* 49:1858–60.
- 579 Felsenstein, J. 1985. Phylogenies and the Comparative Method. *The American Naturalist* 125:1–15.
- 580 Foote, M. 1997. The evolution of morphological diversity. *Annual Review of Ecology and Systematics*  
581 28:129–152.
- 582 Gavrillets, S. and J. B. Losos. 2009. Adaptive radiation: Contrasting theory with data. *Science*  
583 323:732–737.
- 584 Goswami, A. 2007. Cranial modularity and sequence heterochrony in mammals. *Evolution & Development*  
585 9:290–298.
- 586 Hamish, W., B. Jonathan, S. Jennifer, de la Rosa Carolina, R. M. M., and J. Walter. 2014. Eltontraits 1.0:  
587 Specieslevel foraging attributes of the world’s birds and mammals. *Ecology* 95:2027–2027.
- 588 Hansen, T. F. 1997. Stabilizing selection and the comparative analysis of adaptation. *Evolution*  
589 51:1341–1351.
- 590 Hansen, T. F. and E. P. Martins. 1996. Translating between microevolutionary process and  
591 macroevolutionary patterns: the correlation structure of interspecific data. *Evolution* 50:1404–1417.
- 592 Harmon, L. J., J. B. Losos, T. Jonathan Davies, R. G. Gillespie, J. L. Gittleman, W. Bryan Jennings,  
593 K. H. Kozak, M. A. McPeck, F. Moreno-Roark, T. J. Near, A. Purvis, R. E. Ricklefs, D. Schluter, J. A.  
594 Schulte II, O. Seehausen, B. L. Sidlauskas, O. Torres-Carvajal, J. T. Weir, and A. Ø. Mooers. 2010.  
595 Early bursts of body size and shape evolution are rare in comparative data. *Evolution; International*  
596 *Journal of Organic Evolution* 64:2385–2396.
- 597 Harmon, L. J., J. A. Schulte, A. Larson, and J. B. Losos. 2003. Tempo and mode of evolutionary radiation  
598 in iguanian lizards. *Science (New York, N.Y.)* 301:961–964.
- 599 Harmon, L. J., J. T. Weir, C. D. Brock, R. E. Glor, and W. Challenger. 2008. GEIGER: investigating  
600 evolutionary radiations. *Bioinformatics* 24:129–131 PMID: 18006550.
- 601 Höhna, S. 2013. Fast simulation of reconstructed phylogenies under global time-dependent birth-death  
602 processes. *Bioinformatics (Oxford, England)* 29:1367–1374.

- 603 Jones, K. E., J. Bielby, M. Cardillo, S. A. Fritz, J. O'Dell, C. D. L. Orme, K. Safi, W. Sechrest, E. H.  
604 Boakes, C. Carbone, C. Connolly, M. J. Cutts, J. K. Foster, R. Grenyer, M. Habib, C. A. Plaster, S. A.  
605 Price, E. A. Rigby, J. Rist, A. Teacher, O. R. P. Bininda-Emonds, J. L. Gittleman, G. M. Mace, and  
606 A. Purvis. 2009. PanTHERIA: a species-level database of life history, ecology, and geography of extant  
607 and recently extinct mammals. *Ecology* 90:2648–2648.
- 608 Kunegis, J., S. Schmidt, A. Lommatzsch, J. Lerner, E. W. De Luca, and S. Albayrak. 2010. Spectral  
609 analysis of signed graphs for clustering, prediction and visualization. Pages 559–570 *in* Proceedings of  
610 the 2010 SIAM International Conference on Data Mining SIAM.
- 611 Lewitus, E. 2018. Inferring evolutionary process from neuroanatomical data. *Frontiers in Neuroanatomy*  
612 12:54.
- 613 Lewitus, E. and H. Morlon. 2016a. Characterizing and Comparing Phylogenies from their Laplacian  
614 Spectrum. *Systematic Biology* 65:495–507.
- 615 Lewitus, E. and H. Morlon. 2016b. Natural Constraints to Species Diversification. *PLOS Biology*  
616 14:e1002532.
- 617 Manceau, M., A. Lambert, and H. Morlon. 2016. A unifying comparative phylogenetic framework including  
618 traits coevolving across interacting lineages. *Systematic biology* 66:551–568.
- 619 McGraw, P. N. and M. Menzinger. 2008. Laplacian spectra as a diagnostic tool for network structure and  
620 dynamics. *Phys. Rev. E* 77:031102.
- 621 Monteiro, L. R., B. Bordin, and S. F. dos Reis. 2000. Shape distances, shape spaces and the comparison of  
622 morphometric methods. *Trends in ecology & evolution* 15:217–220.
- 623 Morlon, H., E. Lewitus, F. L. Condamine, M. Manceau, J. Clavel, and J. Drury. 2016. RPANDA: an R  
624 package for macroevolutionary analyses on phylogenetic trees. *Methods in Ecology and Evolution*  
625 7:589–597.
- 626 Pennell, M. W. and L. J. Harmon. 2013. An integrative view of phylogenetic comparative methods:  
627 connections to population genetics, community ecology, and paleobiology. *Annals of the New York*  
628 *Academy of Sciences* 1289:90–105.

- 629 Rai, A., P. Pradhan, J. Nagraj, K. Lohitesh, R. Chowdhury, and S. Jalan. 2017. Understanding cancer  
630 complexome using networks, spectral graph theory and multilayer framework. *Scientific Reports* 7:41676  
631 EP –.
- 632 Revell, L. J. 2012. phytools: An r package for phylogenetic comparative biology (and other things).  
633 *Methods in Ecology and Evolution* 3:217–223.
- 634 Reynolds, A., G. Richards, B. de la Iglesia, and V. Rayward-Smith. 2006. Clustering rules: A comparison  
635 of partitioning and hierarchical clustering algorithms. *Journal of Mathematical Modelling and*  
636 *Algorithms* 5:475–504.
- 637 Rohe, K., S. Chatterjee, and B. Yu. 2011. Spectral clustering and the high-dimensional stochastic  
638 blockmodel. *Ann. Statist.* 39:1878–1915.
- 639 Rosenberger, A. L. 1992. Evolution of feeding niches in new world monkeys. *American Journal of Physical*  
640 *Anthropology* 88:525–562.
- 641 Shuman, D., S. Narang, P. Frossard, A. Ortega, and P. Vandergheynst. 2013. The Emerging Field of Signal  
642 Processing on Graphs: Extending High-Dimensional Data Analysis to Networks and Other Irregular  
643 Domains. *IEEE Signal Processing Magazine* 30:83–98.
- 644 Slater, G. J., S. A. Price, F. Santini, and M. E. Alfaro. 2010. Diversity versus disparity and the radiation of  
645 modern cetaceans. *Proceedings of the Royal Society of London B: Biological Sciences* 277:3097–3104.
- 646 Steeman, M. E., M. B. Hebsgaard, R. E. Fordyce, S. Y. Ho, D. L. Rabosky, R. Nielsen, C. Rahbek,  
647 H. Glenner, M. V. Sørensen, and E. Willerslev. 2009. Radiation of extant cetaceans driven by  
648 restructuring of the oceans. *Systematic Biology* 58:573–585.
- 649 Szekely, G. and M. Rizzo. 2005. Hierarchical Clustering via Joint Between-Within Distances: Extending  
650 Ward’s Minimum Variance Method. *Journal of Classification* 22:151–183.
- 651 Uyeda, J. C., D. S. Caetano, and M. W. Pennell. 2015. Comparative analysis of principal components can  
652 be misleading. *Systematic Biology* 64:677–689.
- 653 Weir, J. T. and S. Mursleen. 2013. Diversity-dependent cladogenesis and trait evolution in the adaptive  
654 radiation of the auks (aves: alcidae). *Evolution; International Journal of Organic Evolution* 67:403–416.

655 Zhang, F. and E. R. Hancock. 2008. Graph spectral image smoothing using the heat kernel. Pattern  
656 Recognition 41:3328 – 3342.

| <i>symbol</i>   | <i>descriptor</i>                    | <i>significance</i>                                                                                                               | <i>value</i>                             |
|-----------------|--------------------------------------|-----------------------------------------------------------------------------------------------------------------------------------|------------------------------------------|
| nMGL            | normalized modified graph Laplacian  | the distance matrix of the phylogeny weighted by the differences in trait values between tips and normalized by the degree matrix | positive semi-definite symmetric matrix  |
| ${}_n\lambda$   | eigenvalues                          | eigenvalue calculated from the nMGL                                                                                               | $\sim 1 < {}_n\lambda \leq 2$            |
| SDP             | spectral density profile of the nMGL | the density profile of eigenvalues calculated from the nMGL                                                                       | kernel density estimate of ${}_n\lambda$ |
| ${}_n\lambda^*$ | splitter                             | the maximum eigenvalue; reflects bipartiteness (i.e., monophyletic clustering of trait data)                                      | $1 < {}_n\lambda^* \leq 2$               |
| ${}_n\psi$      | fragmenter                           | the skewness of the SDP; reflects discreteness                                                                                    | $0 < {}_n\psi < \infty$                  |
| ${}_n\eta$      | tracer                               | the maximum height of the SDP; reflects phylogenetic signal                                                                       | $0 < {}_n\eta < \infty$                  |

**Table1:** Glossary of graphical and statistical terms.

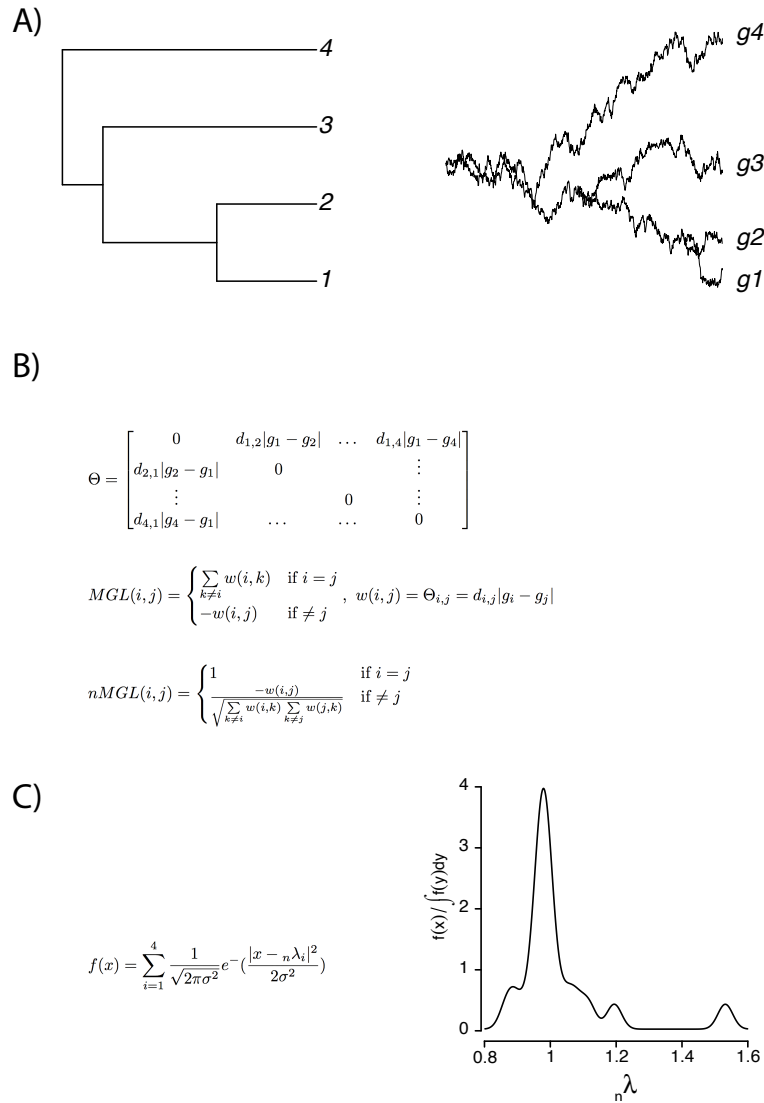

Figure 1: **Pipeline for constructing the spectral density profile for the nMGL of phylogenetic trait data.** (A) Given a phylogenetic tree with  $m$  terminal branches and unidimensional, continuous, extant trait data for  $m$  tips, (B) take the Hadamard product of the difference matrix of the trait data ( $|g_i - g_j|$ ) and the matrix of phylogenetic branch-lengths between tips ( $d_{i,j}$ ), such that  $\Theta = d_{i,j}|g_i - g_j|$  at  $i \neq j$  and zero along the diagonal. The weighted MGL,  $D - \Theta$ , where  $D$  is the degree matrix of  $\Theta$ , is computed as the weighted value of  $(i, j)$ ,  $-\Theta(i, j) = -w(i, j)$ , at  $i \neq j$  and as  $\sum w_{i,k}$  for  $i = j$ . The normalized MGL (nMGL) is normalized by  $D$ , so that  $nMGL = D^{-1/2}(D - \Theta)D^{-1/2}$ , resulting in unity along the diagonal and negative the weighted value of  $(i, j)$  divided by the square-root of the product of  $\delta_i$  and  $\delta_j$  for  $i \neq j$ . (C) The spectral density is obtained by convolving the eigenvalues,  $n\lambda$ , computed from the nMGL with a Gaussian kernel and then plotting the density of  $n\lambda$ .



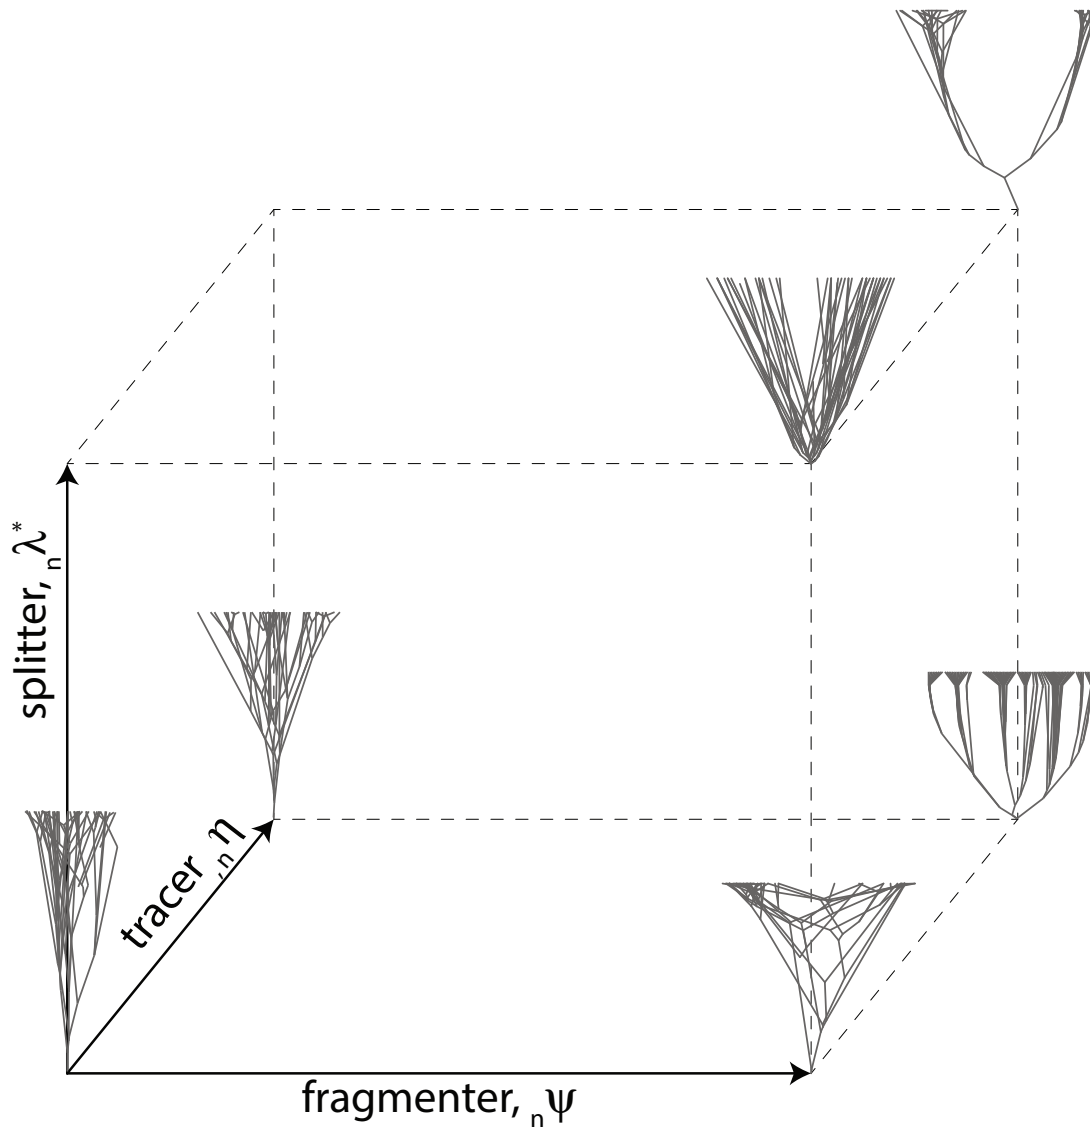

Figure 2: **Defining phylogenetic trait space** Any phylogenetic trait data can be placed in a three-dimensional space defined by the splitter ( ${}_n\lambda^*$ ), the fragmenter ( ${}_n\psi$ ), and the tracer ( ${}_n\eta$ ), which broadly represent the bipartiteness, discreteness, and phylogenetic signal, respectively, of the phylogenetic trait data. Hypothetical traitgrams are placed in the corners of the space, illustrating the type of patterns expected in those corners. Traitgrams are generated on the same phylogenetic tree under different trait evolution parameters.

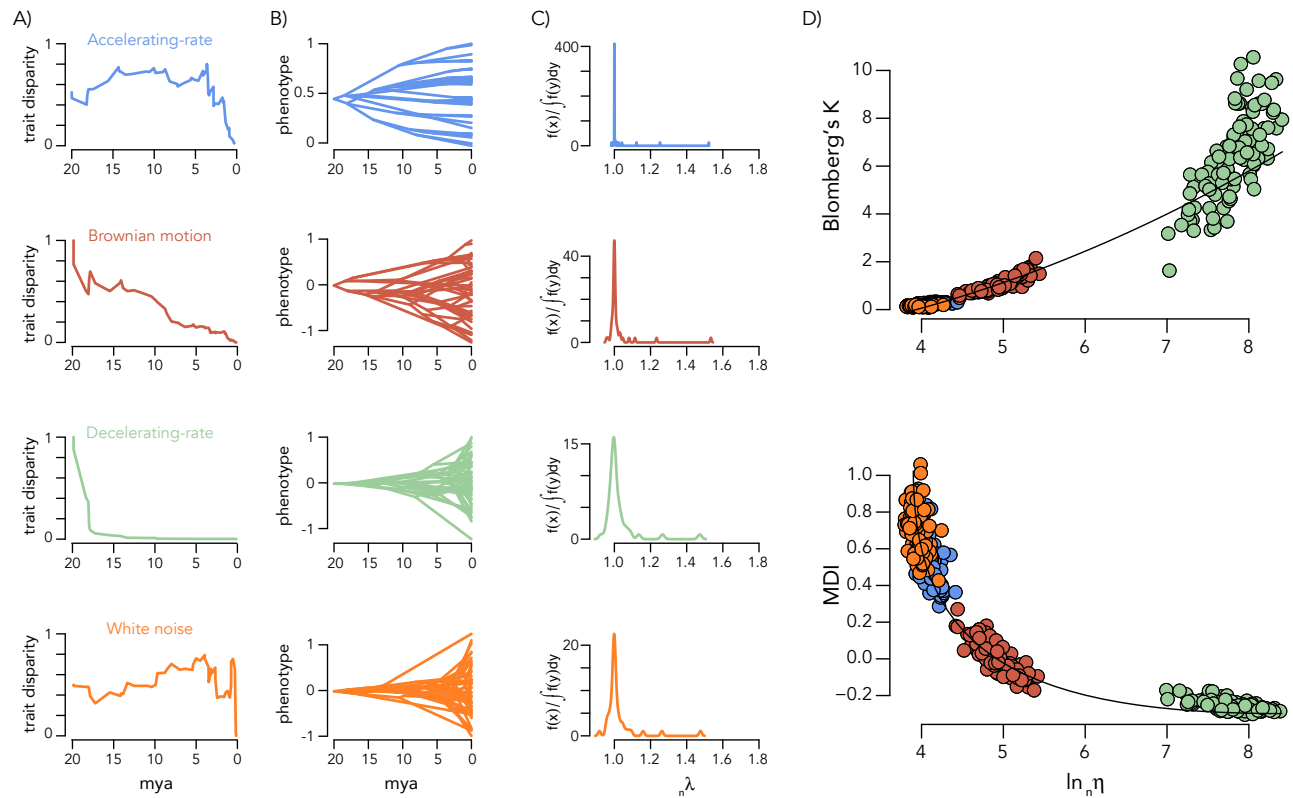

**Figure 3: Interpreting the tracer of spectral density profiles.** (A) Disparity-through-time plots for traits evolved under an AC, BM, DC, and white-noise model on the same 100-tip constant-rate birth-death phylogeny. (B) Traitgrams and (C) spectral density profiles for the phylogenetic traits in (A). Note the difference y-axis range in (C). Pairwise plots of Blomberg's  $K$  and MDI as a function of the tracer for phylogenetic trait data simulated under AC, BM, DC, and white-noise models. The best-fit regression slopes are shown for each plot.

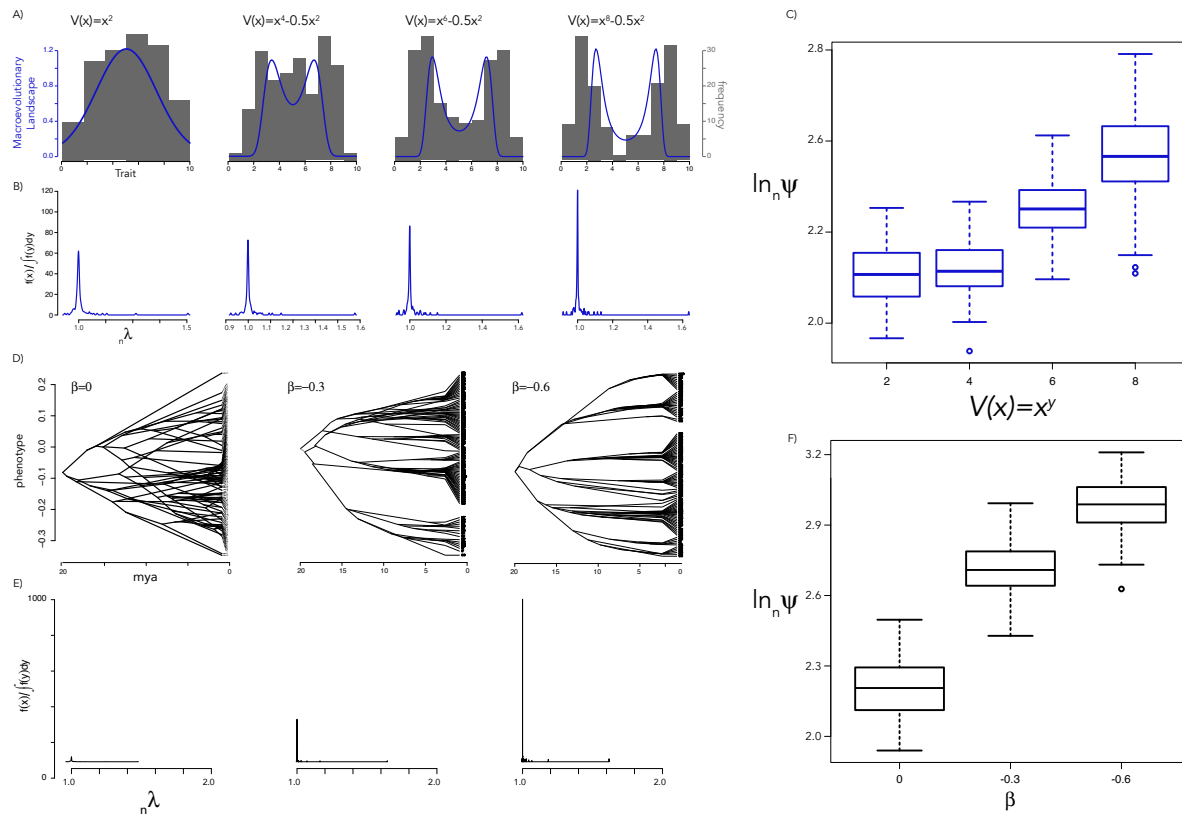

**Figure 4: Interpreting the fragmenter of spectral density profiles.** (A) Histograms of simulated trait values (grey) under four macroevolutionary landscapes (blue). (B) Spectral density profiles for phylogenetic trait data simulated under each landscape in (A). (C) Boxplot of fragmenter values for spectral density profiles generated under each macroevolutionary landscape in (A). (D) Traitgrams of phylogenetic trait data simulated under ACDC models with different rate parameter values,  $\beta$ . (E) Spectral density profiles for the phylogenetic trait data in (D). (F) Boxplot of fragmenter values for phylogenetic trait data simulated under each DC model in (C).

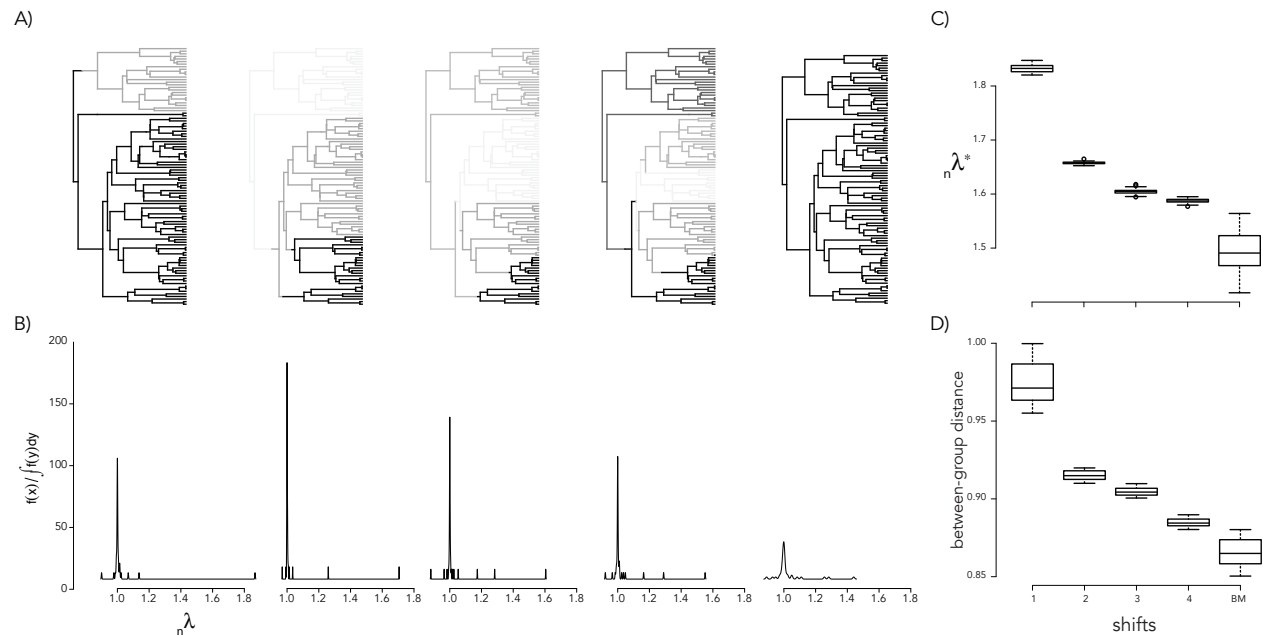

Figure 5: **Interpreting the splitter of spectral density profiles.** (A) Phylogenies simulated with 1 – 4 monophyletic shifts in mean trait values and no shifts in trait value. Different mean trait values are represented in grey scale. (B) Spectral density plots for the phylogenetic trait data in (A). (C) Boxplot of splitter values for phylogenetic trait data simulated under different numbers of monophyletic shifts in mean trait value. (D) Boxplot of the between-cluster branch-length distances (as a ratio over two times the crown age of the tree) for phylogenetic trait data simulated under different shifts in mean trait value, where clusters are defined by k-means clustering on nMGL (with  $k=2$ ). Both splitter and between-cluster branch-length distance increase as the nMGL approaches bipartiteness (splitter= 2).

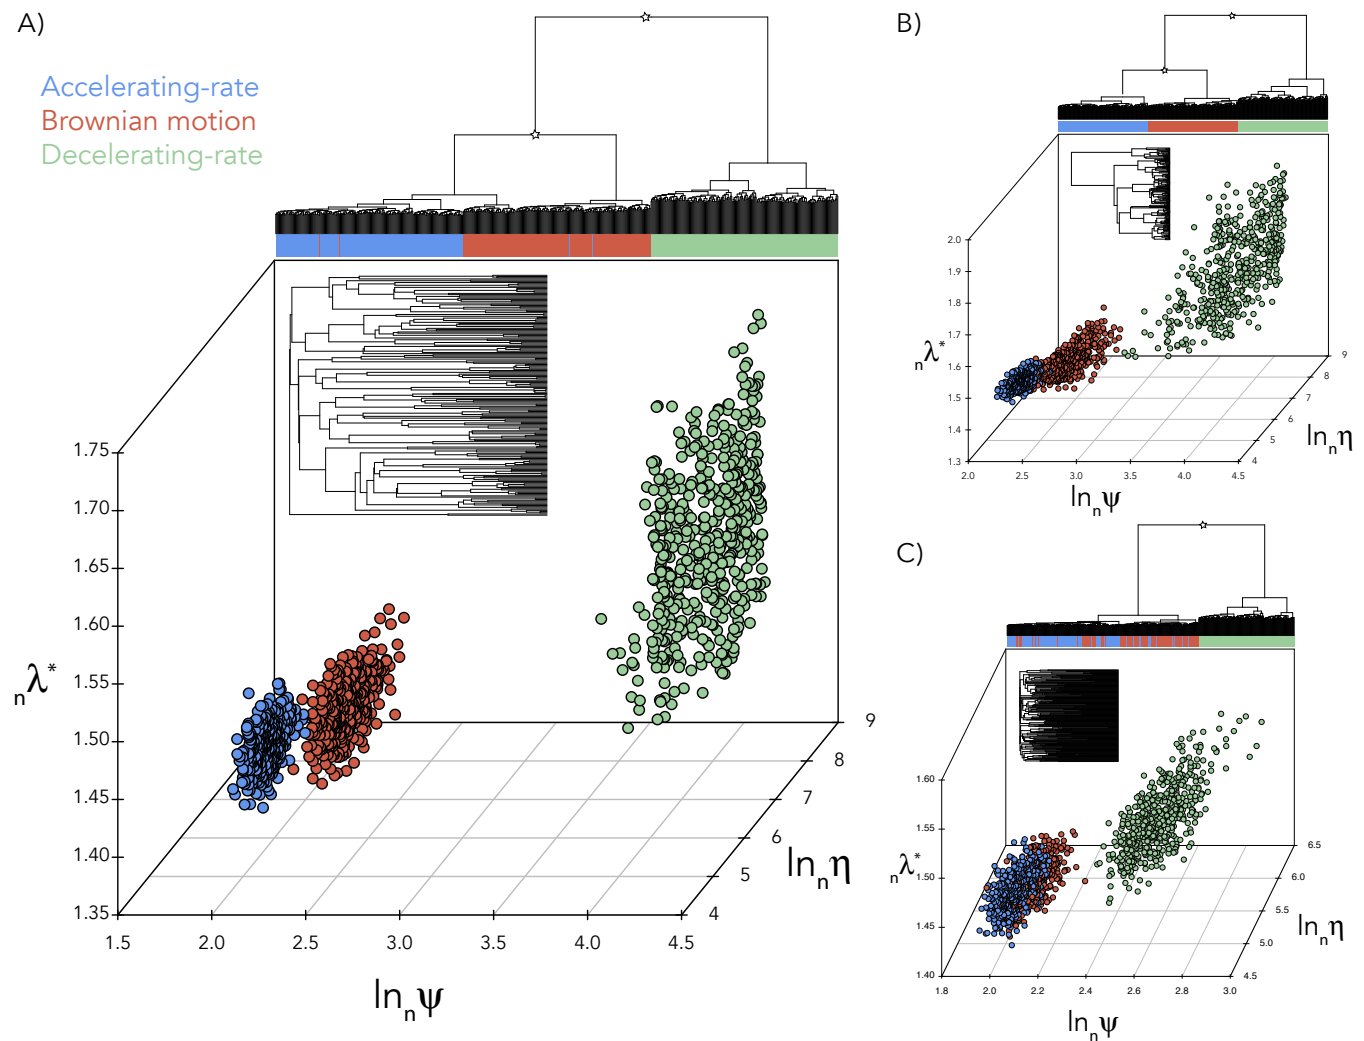

Figure 6: **Clustering phylogenetic trait data using the spectral density profile of the nMGL.** Hierarchical clustering of spectral density profiles and three-dimensional plotting of spectral density profile summary statistics for phylogenetic trait data simulated under AC, BM, and DC models of trait evolution on (A) a constant-rate birth-death tree, (B) an increasing-rate birth-death tree, and (C) a decreasing-rate birth-death tree. The trees are shown as insets. Asterisks denote bootstrap probabilities > 0.95 at the split.

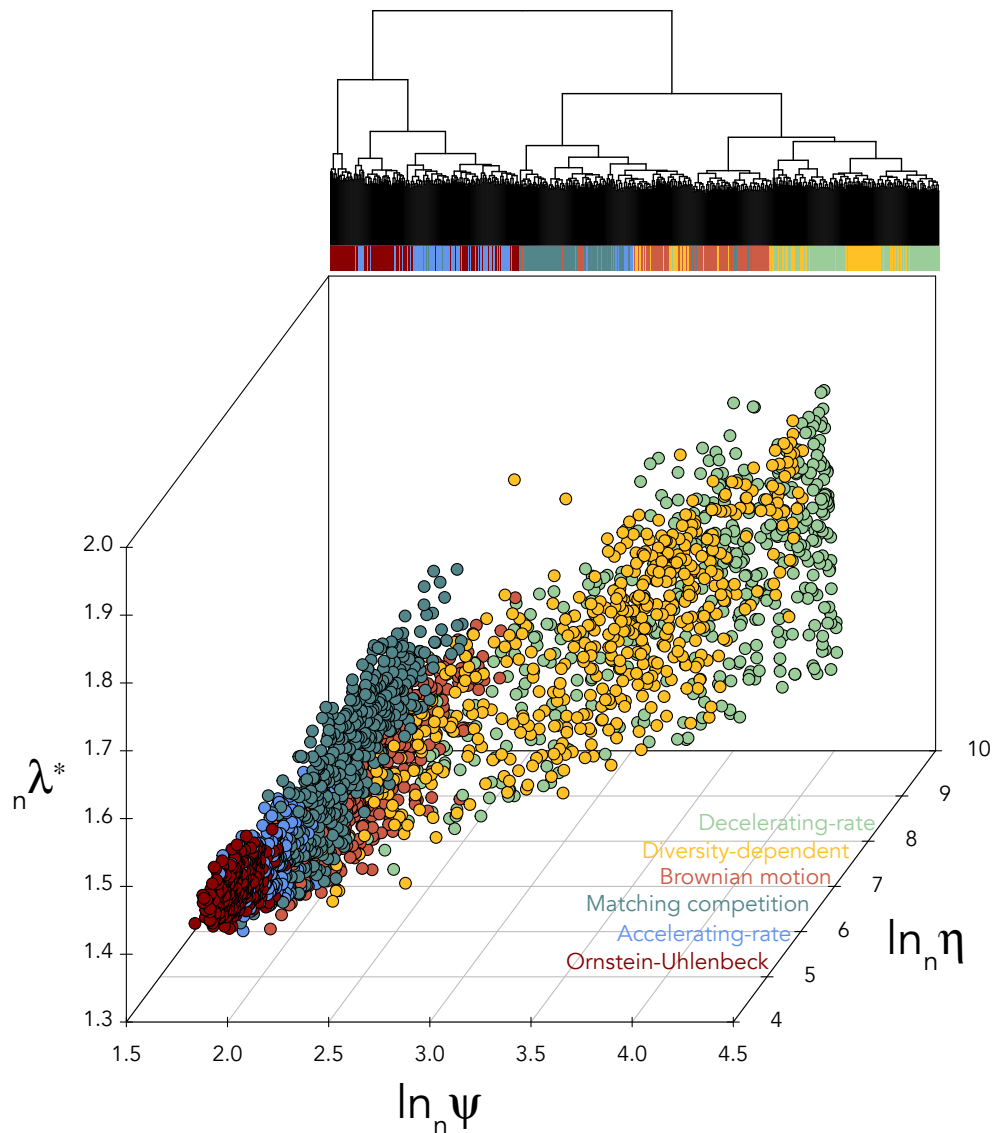

Figure 7: **Spectral density profiles for simulated trait models on the Cetacean phylogeny.** Hierarchical clustering and multidimensional plot of spectral density profile summary statistics for trait data simulated under AC, BM, DC, DD, MC, and OU models under varying parameter values on the Cetacean phylogeny.

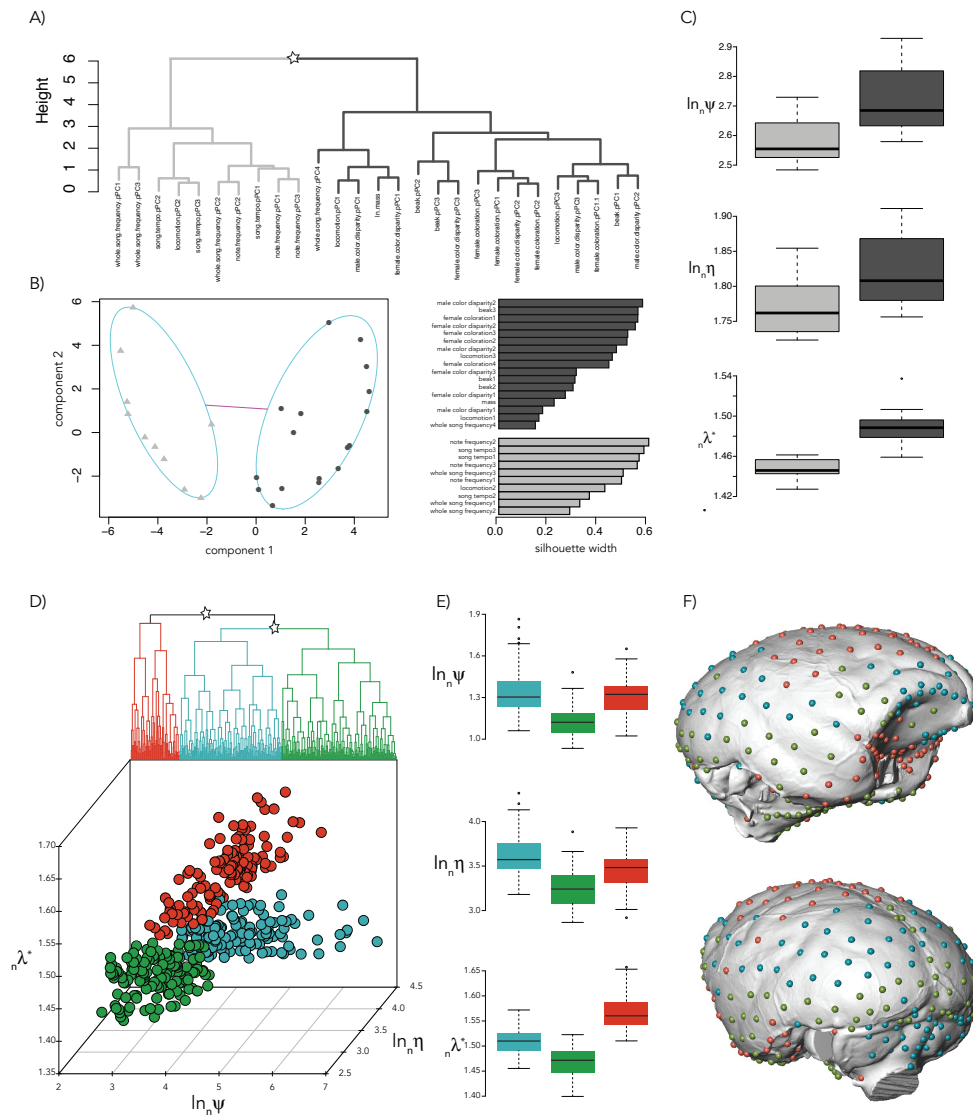

**Figure 8: Spectral density profiling of traits in tanagers and New World monkeys.** (A) Hierarchical and (B) k-medoids clustering on the spectral density profiles of the nMGLs constructed from 27 pPC traits on the tanager phylogeny. Silhouette widths are shown for each pPC trait in the k-medoid clustering. (C) Spectral density profile summary statistics for pPC traits within each cluster identified in (A,B). (D) Hierarchical clustering of spectral density profiles and multidimensional plot of spectral density profile summary statistics for 399 landmarks on New World monkey endocrania: cluster 1 (blue), cluster 2 (green), cluster 3 (red). (E) Boxplot of summary statistics for each cluster identified in (D). (F) Three-dimensional representation of the New World monkey endocranium with placement of the clusters of landmarks corresponding to (D).

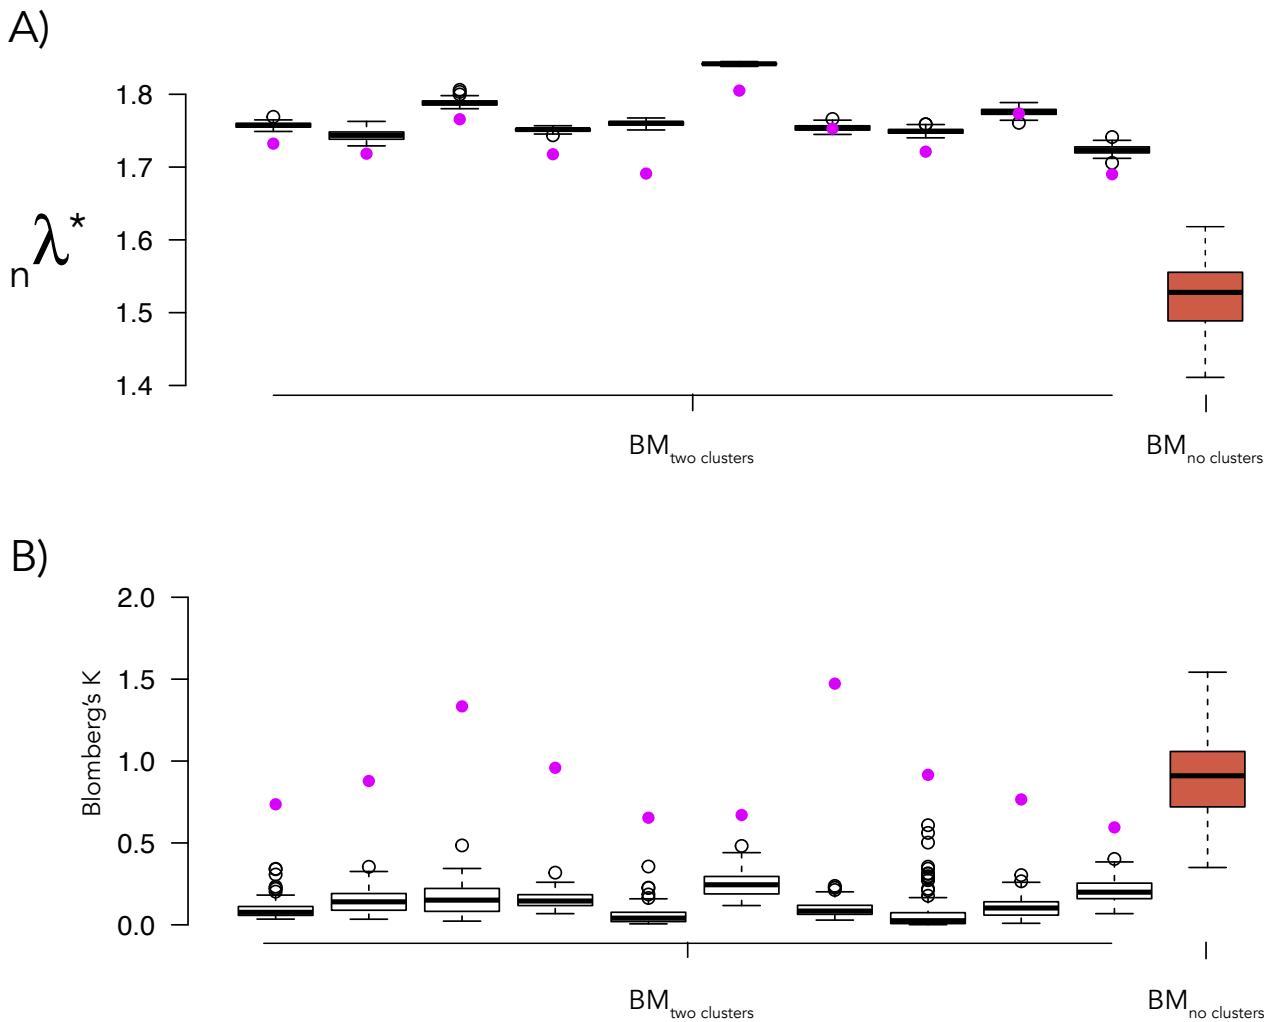

Figure S1: **Measuring the effect of phylogenetic signal on splitter values.** (A) Boxplot of the splitter values for 100 randomized datasets (white) obtained for each of the ten datasets with two monophyletic clusters. Splitter values for the initial BM datasets with two clusters are shown in purple. Boxplot of 100 datasets simulated under a simple BM process with no clusters on a single tree (coral) is shown for comparison. (B) Boxplot of Blomberg's  $K$  for each randomized dataset (white); values for the initial BM datasets with two clusters are shown in purple. Boxplot of 100 datasets simulated under a simple BM process with no clusters on a single tree (coral) is shown for comparison.



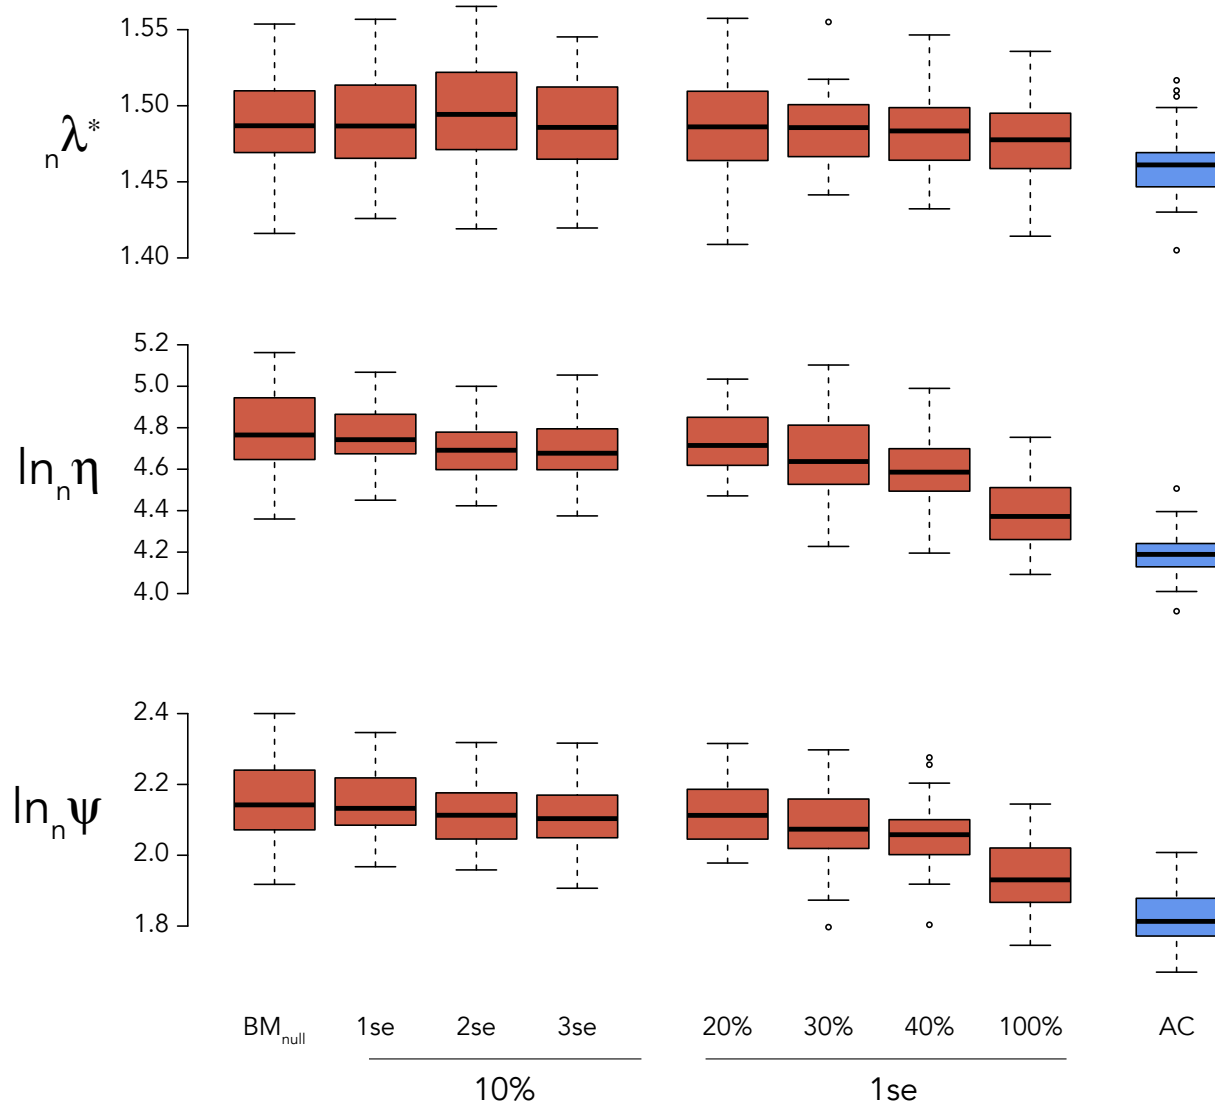

Figure S2: **Measuring the effect of erroneous trait data on spectral density profile summary statistics.** Spectral density profile summary statistics for data simulated under a BM process (coral) with introduced error for 10% of tips with a sampling variance equal to one, two, and three times the standard error of the simulated BM data; and with a sampling variance equal to one times the standard error for 10, 20, 30, 100% of tips. Spectral density profile summary statistics for data simulated on the same tree under an ACDC process ( $\beta = 1.5$ ) is also shown (cornflowerblue).

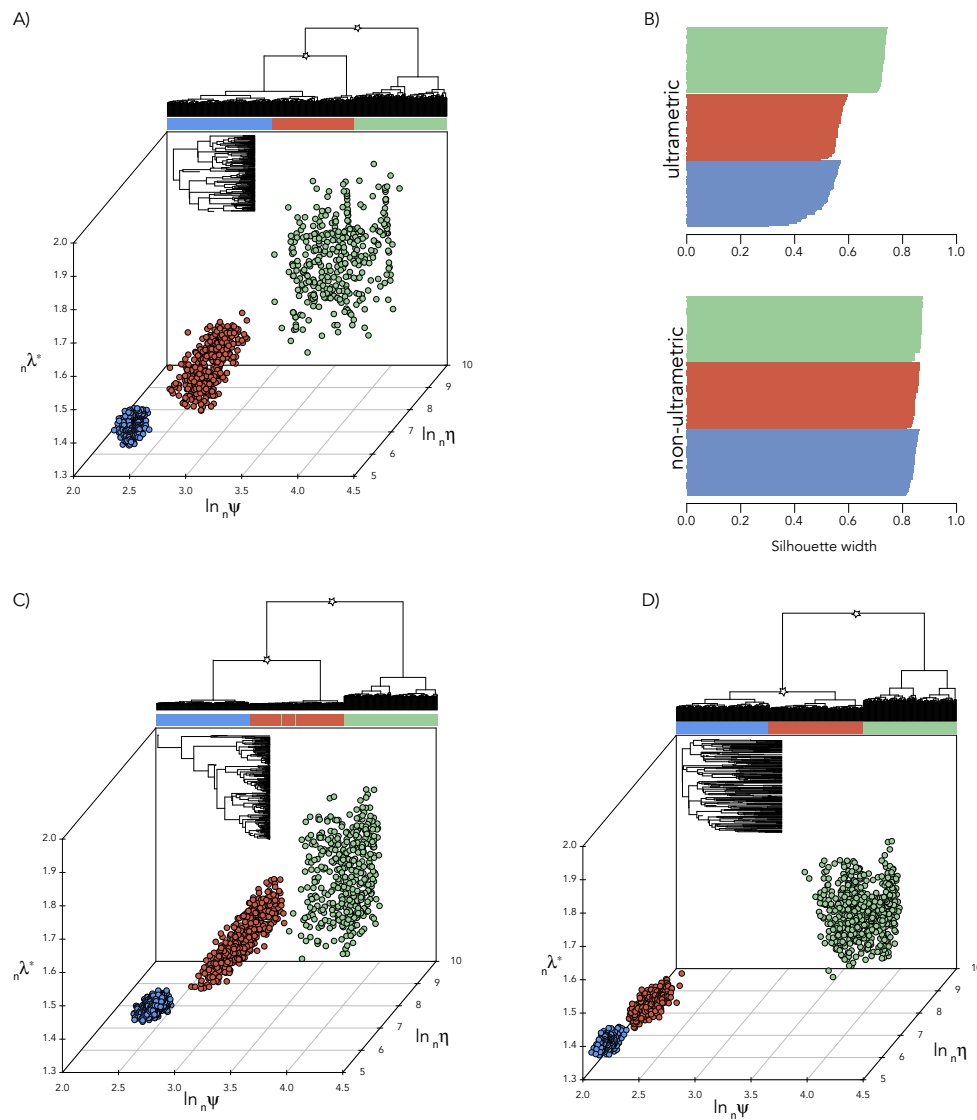

**Figure S3: Clustering phylogenetic trait data using the spectral density profile of the nMGL on a non-ultrametric tree.** Hierarchical clustering of spectral density profiles and three-dimensional plotting of spectral density profile summary statistics for phylogenetic trait data simulated under AC (cornflower blue), BM (coral), and DC (sea green) models of trait evolution on a single (A) constant-rate, (C) increasing-rate, and (D) decreasing-rate birth-death tree without pruning extinct lineages. Tree is shown in inset. Asterisks denote bootstrap probabilities  $> 0.95$  at the split. (B) Silhouette widths for profiles comprising each trait model cluster simulated on the ultrametric or non-ultrametric tree (see Fig. 5A).

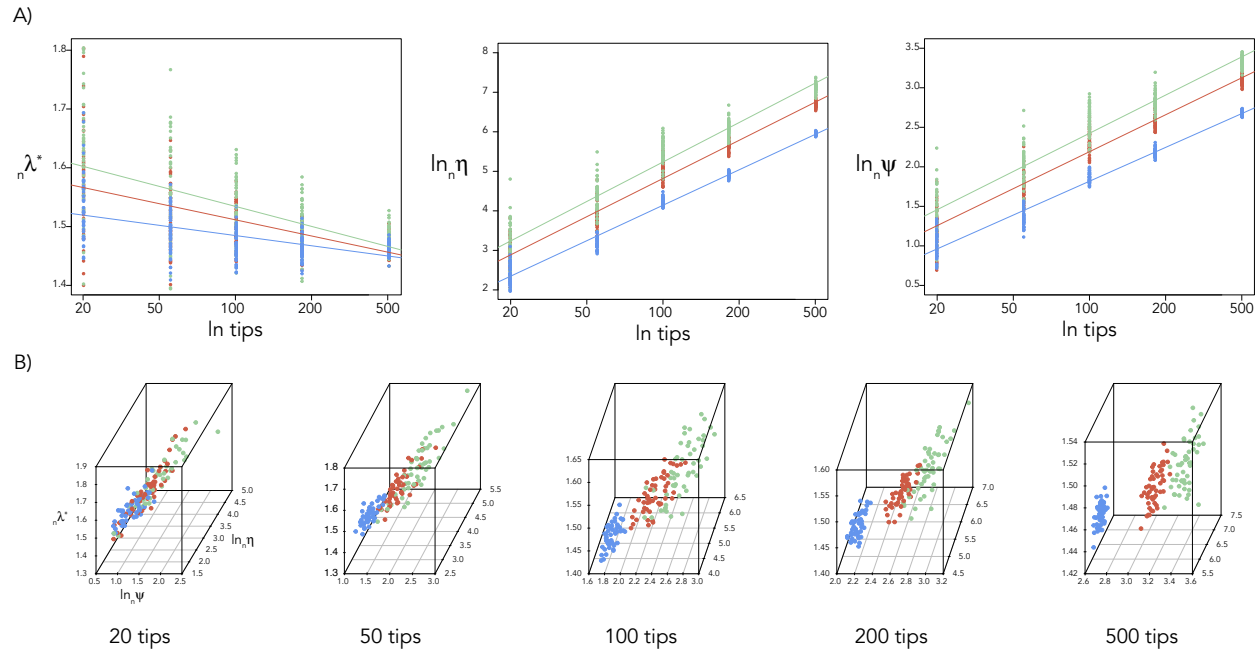

Figure S4: **Effect of tree size on the nMGL.** (A) Scatterplots and OLS regression slopes for spectral density profile summary statistics for trait data simulated under DC (sea green), BM (coral), and AC (cornflower blue) models on constant-rate birth-death trees with different numbers of tips. (B) Phylogenetic trait space for trait models simulated under AC, BM, and DC models on trees with different numbers of tips.
